# Supplementary material for: A new asymmetric activation strategy for hydrazones as acyl anion equivalents in the bimetallic catalyzed carbonyl-ene reaction
Source: Royal Society of Chemistry journal article supplement (doi:10.1039/d1ob00017a), 2021-01-01

Supporting Information

**Cooperative Dinuclear Zinc-Catalyzed Asymmetric Carbonyl-Ene Reaction: A Novel  
Promotion Strategy for Hydrazone**

Wen-Bo Hu, Xixi Song and Min-Can Wang\*

The College of Chemistry and Molecular Engineering, Zhengzhou University, 75 Daxue  
Road, Zhengzhou, Henan 450052, P. R. China

E-mail: wangmincan@zzu.edu.cn

Table of Contents

|                                                                           |     |
|---------------------------------------------------------------------------|-----|
| Chiral HPLC Spectra of the Asymmetric Carbonyl-Ene Reaction Products..... | S2  |
| NMR Spectra for the products.....                                         | S20 |
| IR and HRMS Spectra of <b>3ha</b> .....                                   | S43 |

# Spectra

Chiralpak AS column [hexane/*i*-PrOH (95:5) 1 mL/min]

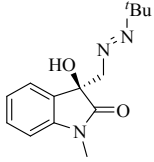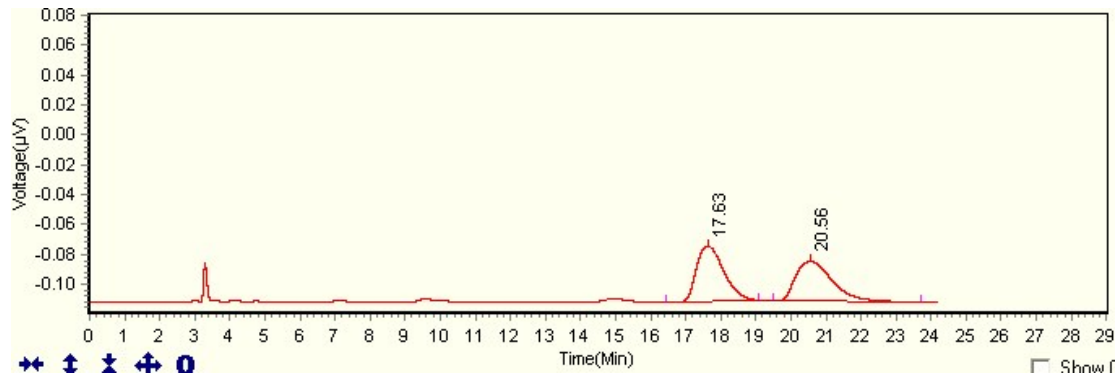

| No.   | Retention Time | Peak Area | Peak Height | Peak Area(%) | Peak Width |
|-------|----------------|-----------|-------------|--------------|------------|
| 1     | 17.63          | 977111    | 18272       | 50.67%       | 2.648      |
| 2     | 20.56          | 951091    | 13236       | 49.33%       | 4.181      |
| Total |                | 1,928,202 | 31,508      | 100.00%      |            |

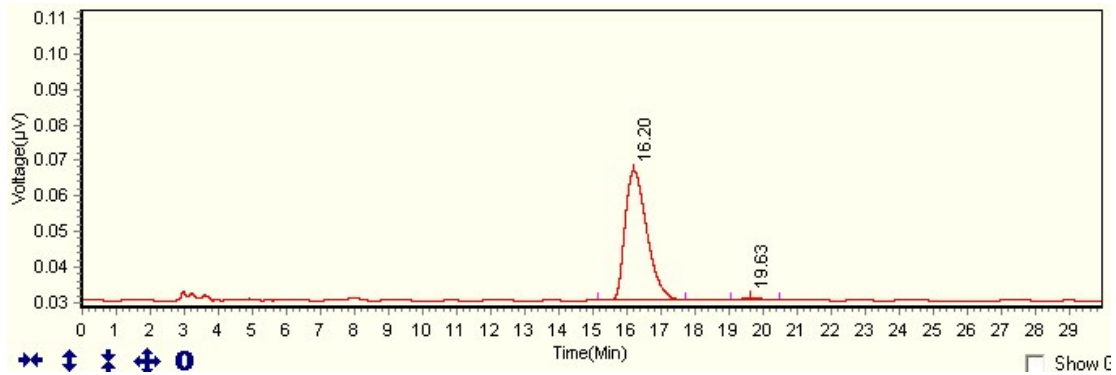

| No.   | Retention Time | Peak Area | Peak Height | Peak Area(%) | Peak Width |
|-------|----------------|-----------|-------------|--------------|------------|
| 1     | 16.20          | 805095    | 18150       | 98.50%       | 2.563      |
| 2     | 19.63          | 12247     | 264         | 1.50%        | 1.454      |
| Total |                | 817,342   | 18,414      | 100.00%      |            |

Chiralpak AS column [hexane/*i*-PrOH (90:10) 1 mL/min]

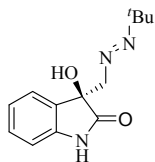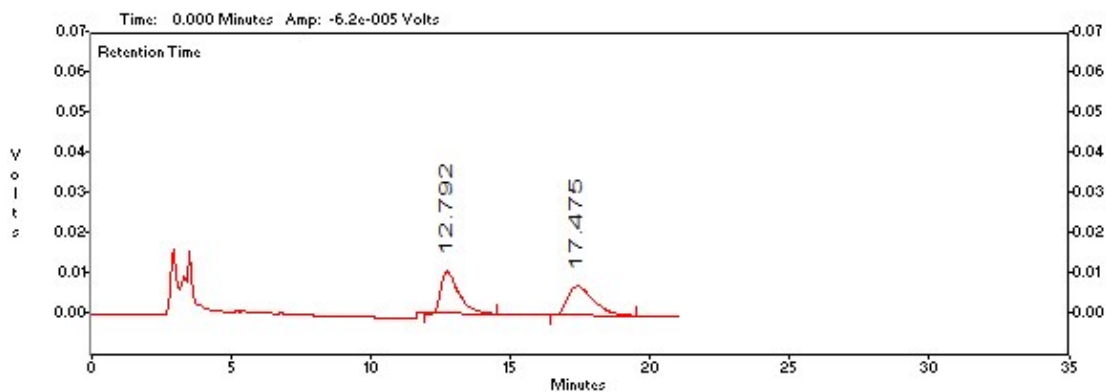

| Pkno          | Ret. Time | Area          | Area%          | Height       | Height%        | Flags |
|---------------|-----------|---------------|----------------|--------------|----------------|-------|
| 1             | 12.792    | 475415        | 50.540         | 10506        | 59.182         | MM    |
| 2             | 17.475    | 465247        | 49.460         | 7246         | 40.818         | MM    |
| <b>Totals</b> |           | <b>940662</b> | <b>100.000</b> | <b>17751</b> | <b>100.000</b> |       |

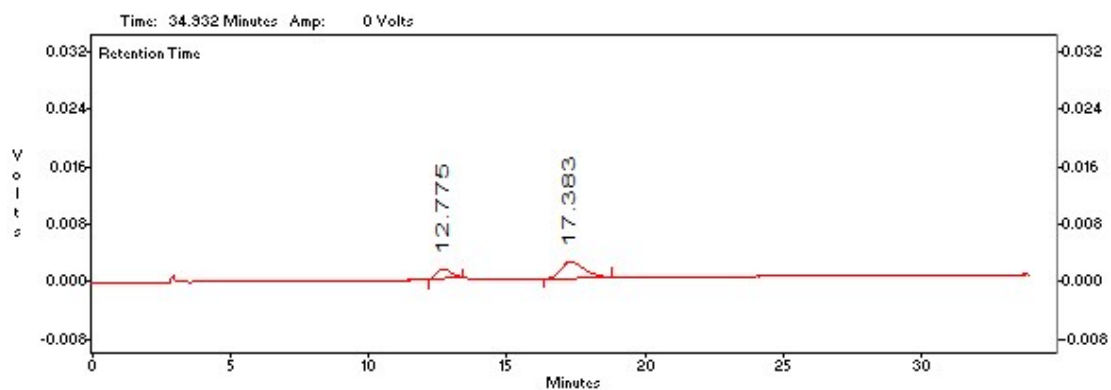

| Pkno          | Ret. Time | Area          | Area%          | Height      | Height%        | Flags |
|---------------|-----------|---------------|----------------|-------------|----------------|-------|
| 1             | 12.775    | 50365         | 27.349         | 1375        | 37.692         | MM    |
| 2             | 17.383    | 133789        | 72.651         | 2273        | 62.308         | MM    |
| <b>Totals</b> |           | <b>184154</b> | <b>100.000</b> | <b>3648</b> | <b>100.000</b> |       |

Chiralpak AS column [hexane/*i*-PrOH (95:5) 0.8 mL/min]

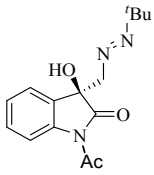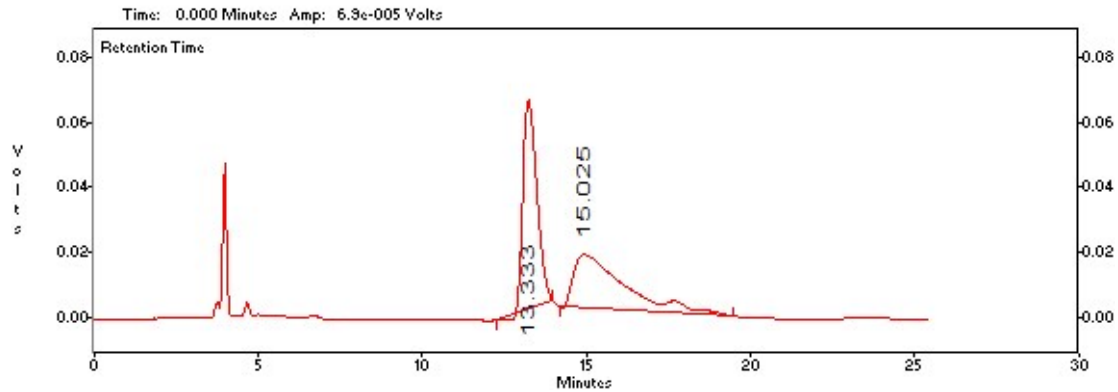

| Pkno          | Ret. Time | Area           | Area%          | Height       | Height%        | Flags |
|---------------|-----------|----------------|----------------|--------------|----------------|-------|
| 1             | 13.333    | 1954842        | 51.981         | 64479        | 79.580         | MM    |
| 2             | 15.025    | 1805812        | 48.019         | 16545        | 20.420         | MM    |
| <b>Totals</b> |           | <b>3760654</b> | <b>100.000</b> | <b>81024</b> | <b>100.000</b> |       |

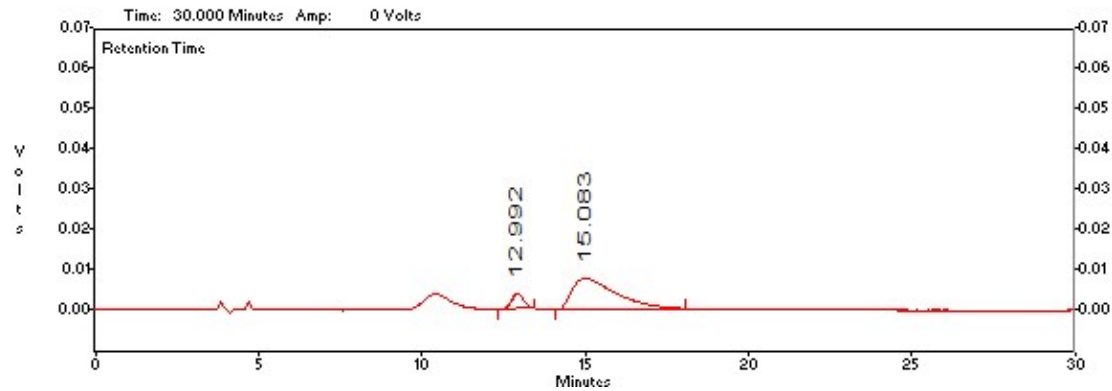

| Pkno          | Ret. Time | Area          | Area%          | Height       | Height%        | Flags |
|---------------|-----------|---------------|----------------|--------------|----------------|-------|
| 1             | 12.992    | 102841        | 12.540         | 3741         | 32.650         | MM    |
| 2             | 15.083    | 717289        | 87.460         | 7718         | 67.350         | MM    |
| <b>Totals</b> |           | <b>820131</b> | <b>100.000</b> | <b>11459</b> | <b>100.000</b> |       |

Chiralpak AS column [hexane/*i*-PrOH (95:5) 1 mL/min]

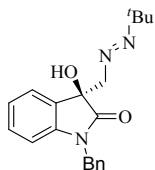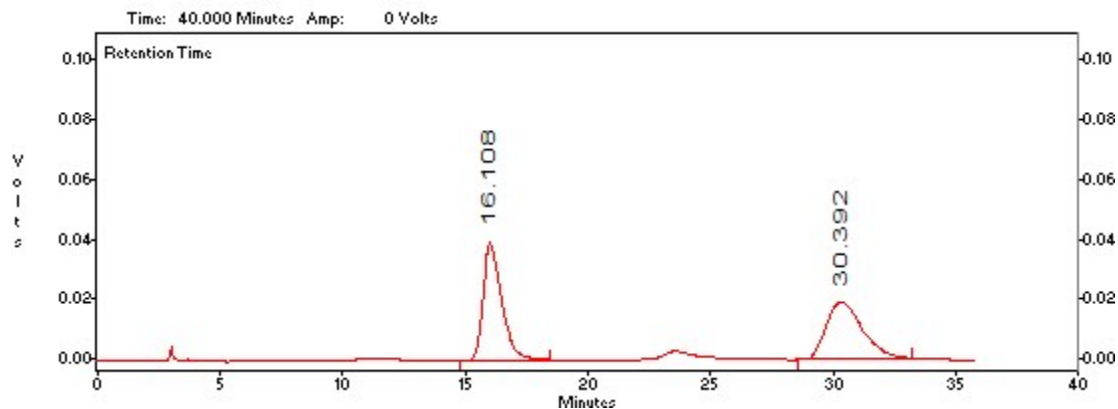

| Pkno          | Ret. Time | Area           | Area%          | Height       | Height%        | Flags |
|---------------|-----------|----------------|----------------|--------------|----------------|-------|
| 1             | 16.108    | 2057421        | 50.763         | 39164        | 66.844         | MM    |
| 2             | 30.392    | 1995568        | 49.237         | 19426        | 33.156         | MM    |
| <b>Totals</b> |           | <b>4052989</b> | <b>100.000</b> | <b>58589</b> | <b>100.000</b> |       |

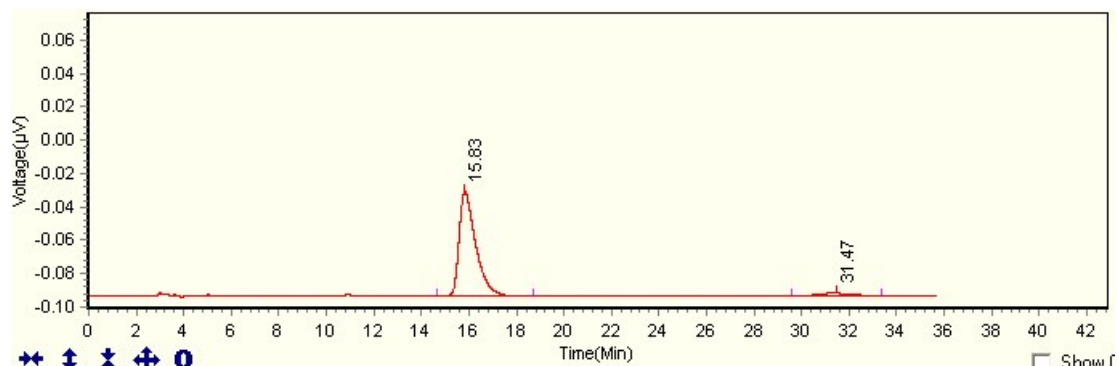

| No.   | Retention Time | Peak Area | Peak Height | Peak Area(%) | Peak Width |
|-------|----------------|-----------|-------------|--------------|------------|
| 1     | 15.83          | 1496903   | 31116       | 95.08%       | 4.048      |
| 2     | 31.47          | 77506     | 756         | 4.92%        | 3.774      |
| Total |                | 1,574,409 | 31,872      | 100.00%      |            |

Chiralpak OD-H column [hexane/*i*-PrOH (95:5) 1 mL/min]

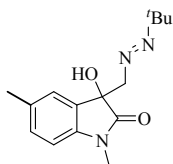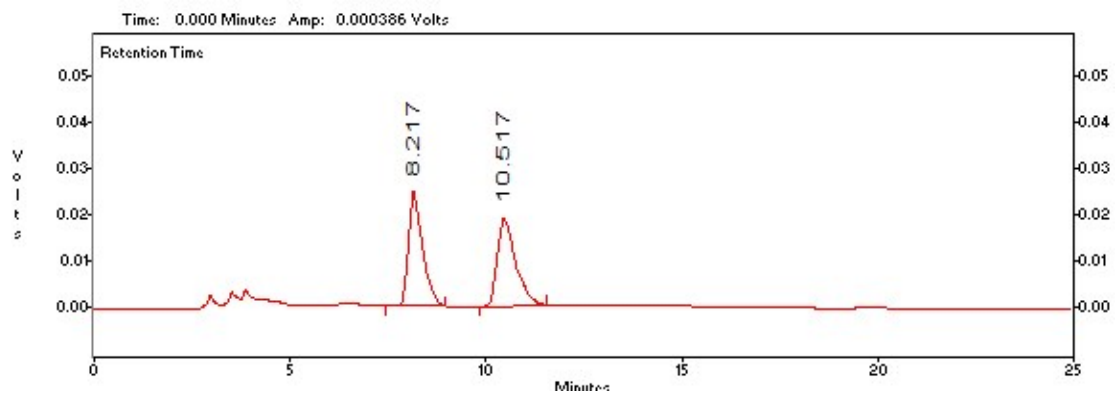

| Pkno          | Ret. Time | Area           | Area%          | Height       | Height%        | Flags |
|---------------|-----------|----------------|----------------|--------------|----------------|-------|
| 1             | 8.217     | 610800         | 49.912         | 24733        | 56.643         | MM    |
| 2             | 10.517    | 612948         | 50.088         | 18932        | 43.357         | MM    |
| <b>Totals</b> |           | <b>1223748</b> | <b>100.000</b> | <b>43664</b> | <b>100.000</b> |       |

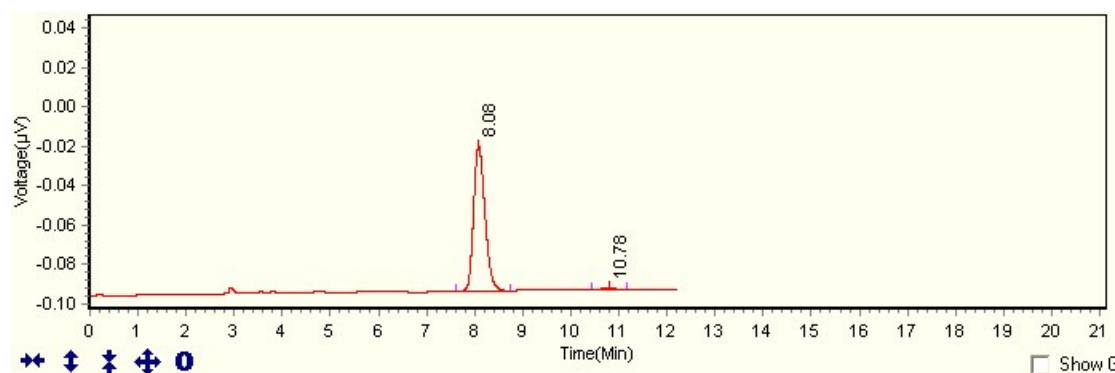

| No.   | Retention Time | Peak Area | Peak Height | Peak Area(%) | Peak Width |
|-------|----------------|-----------|-------------|--------------|------------|
| 1     | 8.08           | 602501    | 36738       | 98.02%       | 1.128      |
| 2     | 10.78          | 12200     | 590         | 1.98%        | 0.705      |
| Total |                | 614,701   | 37,328      | 100.00%      |            |

Chiralpak OD-H column [hexane/*i*-PrOH (95:5) 1 mL/min]

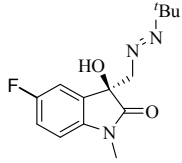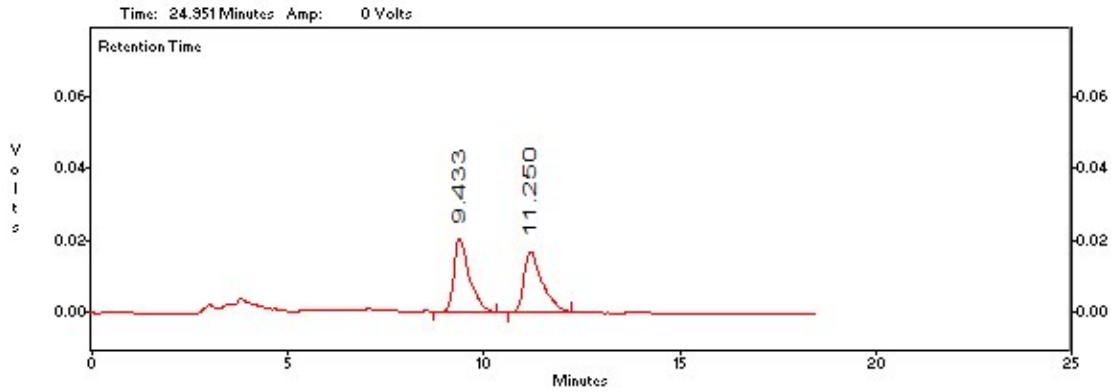

| Pkno          | Ret. Time | Area           | Area%          | Height       | Height%        | Flags |
|---------------|-----------|----------------|----------------|--------------|----------------|-------|
| 1             | 9.433     | 552257         | 50.660         | 20344        | 54.694         | MM    |
| 2             | 11.250    | 537861         | 49.340         | 16852        | 45.306         | MM    |
| <b>Totals</b> |           | <b>1090118</b> | <b>100.000</b> | <b>37196</b> | <b>100.000</b> |       |

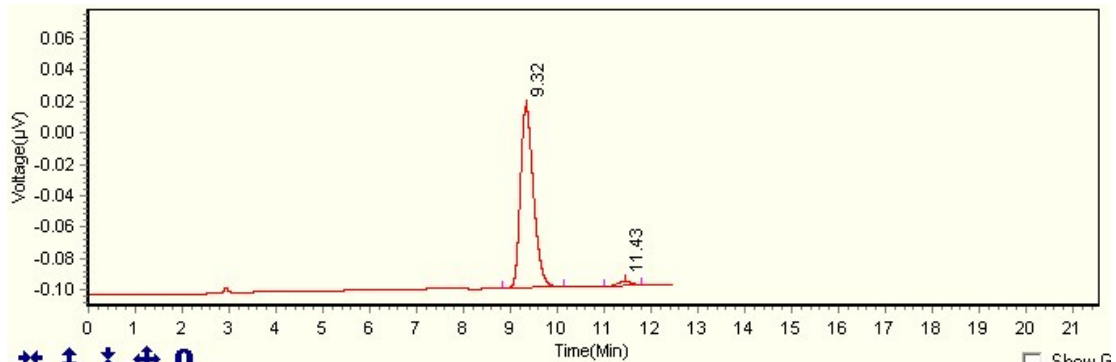

| No.   | Retention Time | Peak Area | Peak Height | Peak Area(%) | Peak Width |
|-------|----------------|-----------|-------------|--------------|------------|
| 1     | 9.32           | 1113886   | 57691       | 97.47%       | 1.34       |
| 2     | 11.43          | 28885     | 1416        | 2.53%        | 0.766      |
| Total |                | 1,142,771 | 59,107      | 100.00%      |            |

Chiralpak OD-H column [hexane/i-PrOH (95:5) 1 mL/min]

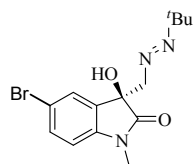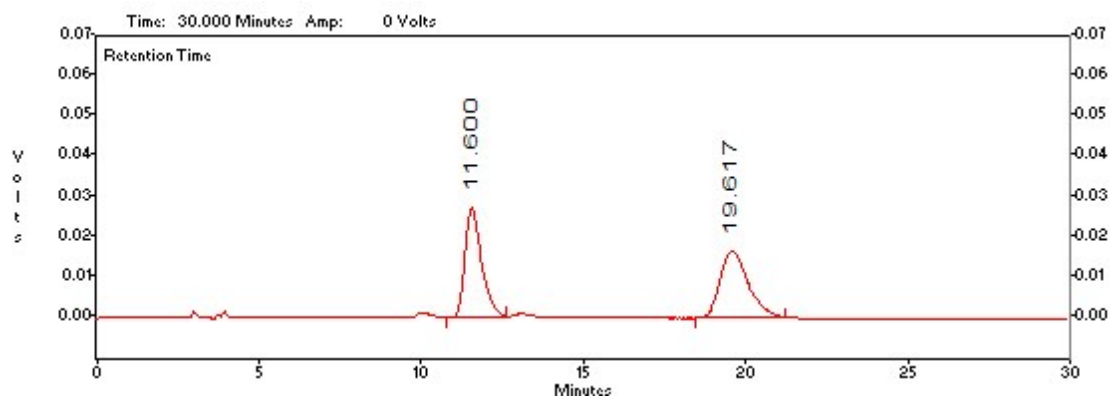

| Pkno          | Ret. Time | Area           | Area%          | Height       | Height%        | Flags |
|---------------|-----------|----------------|----------------|--------------|----------------|-------|
| 1             | 11.600    | 979378         | 49.812         | 27069        | 62.007         | MM    |
| 2             | 19.617    | 986762         | 50.188         | 16586        | 37.993         | MM    |
| <b>Totals</b> |           | <b>1966140</b> | <b>100.000</b> | <b>43655</b> | <b>100.000</b> |       |

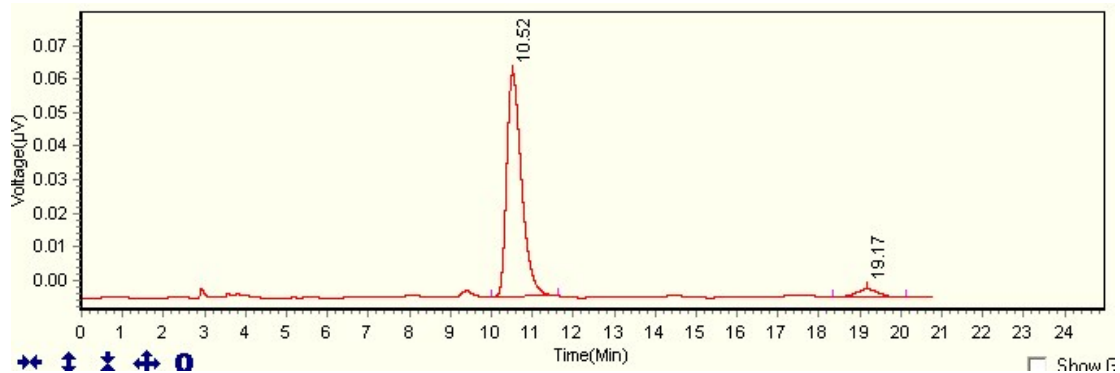

| No.          | Retention Time | Peak Area      | Peak Height   | Peak Area(%)   | Peak Width |
|--------------|----------------|----------------|---------------|----------------|------------|
| 1            | 10.52          | 840054         | 33252         | 95.22%         | 1.628      |
| 2            | 19.17          | 42153          | 1147          | 4.78%          | 1.786      |
| <b>Total</b> |                | <b>882,207</b> | <b>34,399</b> | <b>100.00%</b> |            |



Chiralpak OD-H column [hexane/i-PrOH (95:5) 1 mL/min]

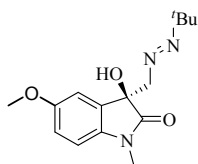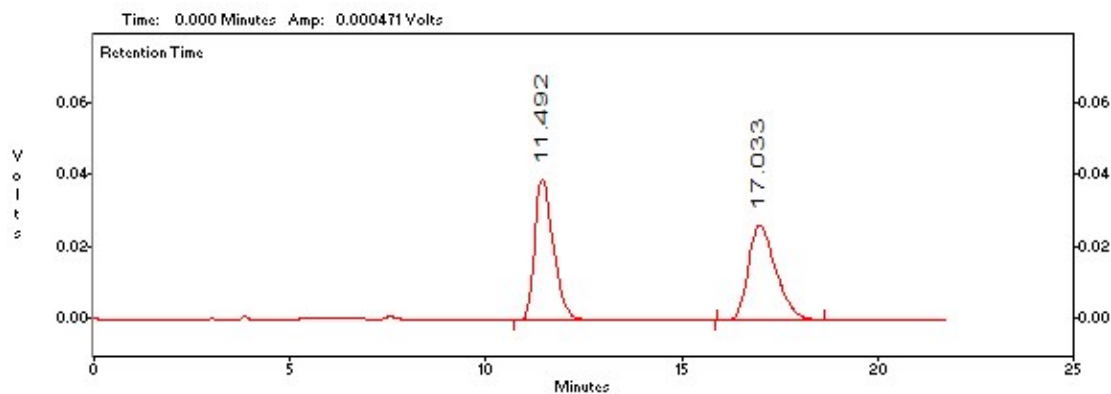

| Pkno          | Ret. Time | Area           | Area%          | Height       | Height%        | Flags |
|---------------|-----------|----------------|----------------|--------------|----------------|-------|
| 1             | 11.492    | 1301086        | 50.323         | 39227        | 59.727         | MM    |
| 2             | 17.033    | 1284407        | 49.677         | 26450        | 40.273         | MM    |
| <b>Totals</b> |           | <b>2585493</b> | <b>100.000</b> | <b>65676</b> | <b>100.000</b> |       |

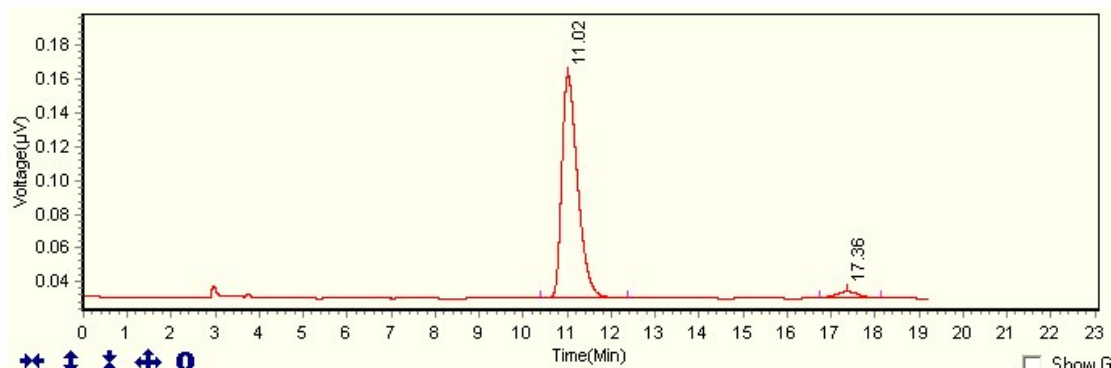

| No.   | Retention Time | Peak Area | Peak Height | Peak Area(%) | Peak Width |
|-------|----------------|-----------|-------------|--------------|------------|
| 1     | 11.02          | 1635304   | 65765       | 96.60%       | 1.983      |
| 2     | 17.36          | 57488     | 1757        | 3.40%        | 1.395      |
| Total |                | 1,692,792 | 67,522      | 100.00%      |            |

Chiralpak OD-H column [hexane/*i*-PrOH (95:5) 1 mL/min]

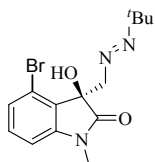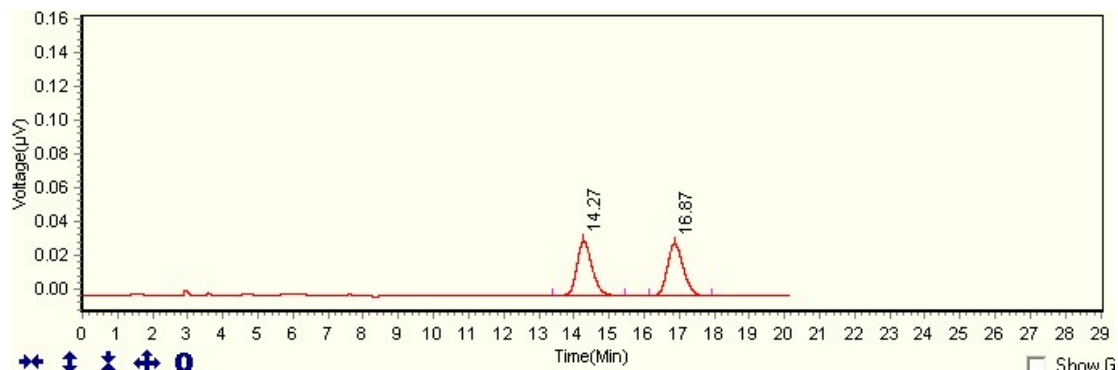

| No.   | Retention Time | Peak Area | Peak Height | Peak Area(%) | Peak Width |
|-------|----------------|-----------|-------------|--------------|------------|
| 1     | 14.27          | 477116    | 16061       | 49.69%       | 2.063      |
| 2     | 16.87          | 483165    | 15342       | 50.31%       | 1.788      |
| Total |                | 960,281   | 31,403      | 100.00%      |            |

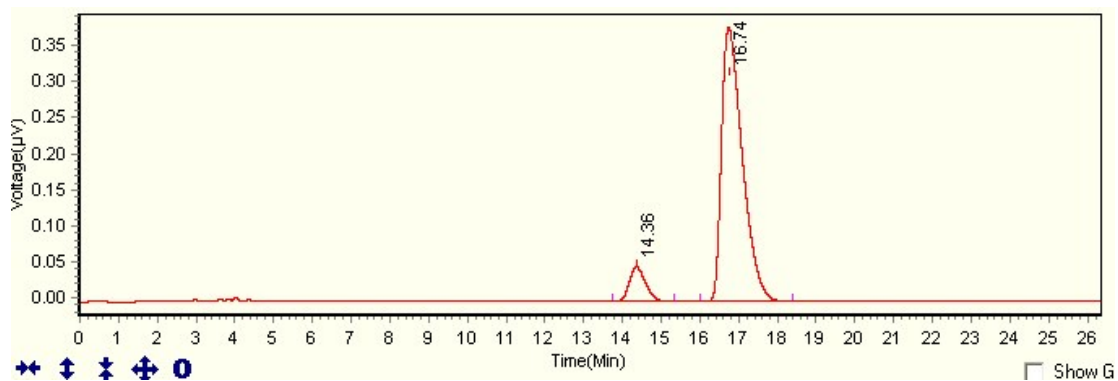

| No.   | Retention Time | Peak Area | Peak Height | Peak Area(%) | Peak Width |
|-------|----------------|-----------|-------------|--------------|------------|
| 1     | 14.36          | 694092    | 23983       | 8.93%        | 1.592      |
| 2     | 16.74          | 7078537   | 189575      | 91.07%       | 2.388      |
| Total |                | 7,772,629 | 213,558     | 100.00%      |            |

Chiralpak AS column [hexane/i-PrOH (95:5) 1 mL/min]

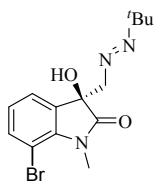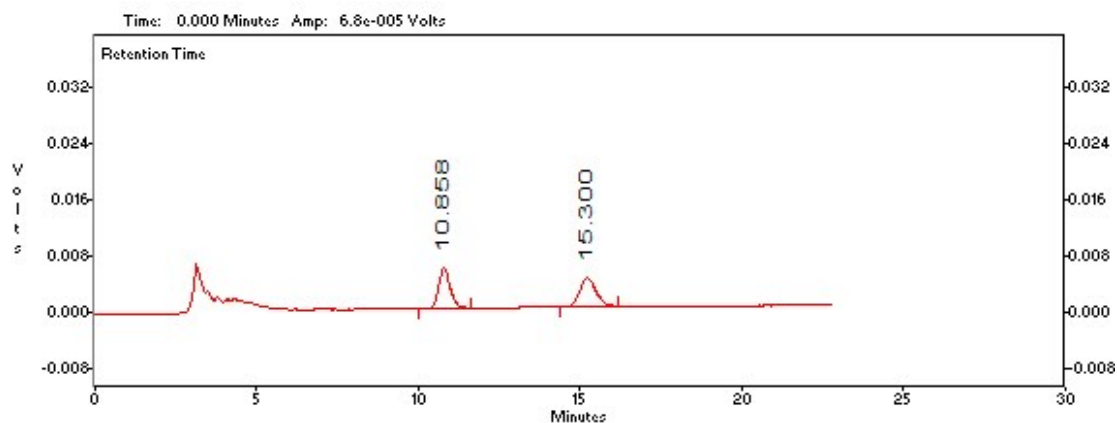

| Pkno          | Ret. Time | Area          | Area%          | Height      | Height%        | Flags |
|---------------|-----------|---------------|----------------|-------------|----------------|-------|
| 1             | 10.858    | 142893        | 50.353         | 5666        | 58.565         | MM    |
| 2             | 15.300    | 140887        | 49.647         | 4009        | 41.435         | MM    |
| <b>Totals</b> |           | <b>283780</b> | <b>100.000</b> | <b>9675</b> | <b>100.000</b> |       |

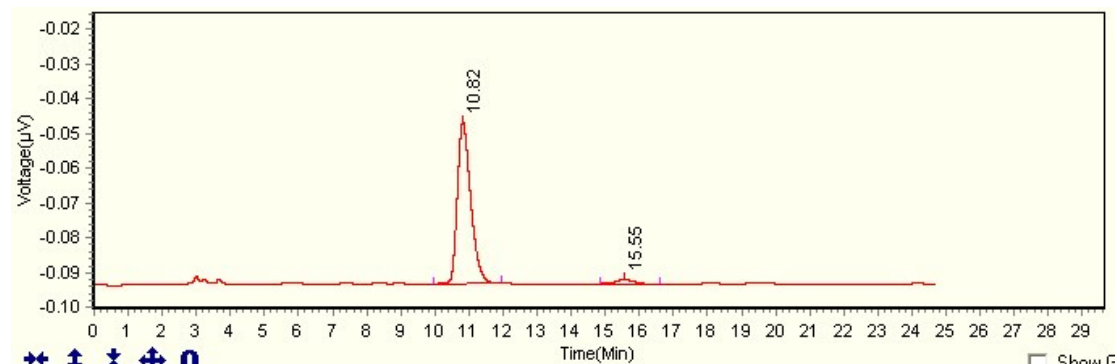

| No.   | Retention Time | Peak Area | Peak Height | Peak Area(%) | Peak Width |
|-------|----------------|-----------|-------------|--------------|------------|
| 1     | 10.82          | 635385    | 23242       | 96.91%       | 1.993      |
| 2     | 15.55          | 20229     | 592         | 3.09%        | 1.756      |
| Total |                | 655,614   | 23,834      | 100.00%      |            |

Chiralpak OD-H column [hexane/i-PrOH (90:10) 1mL/min]

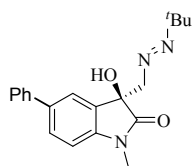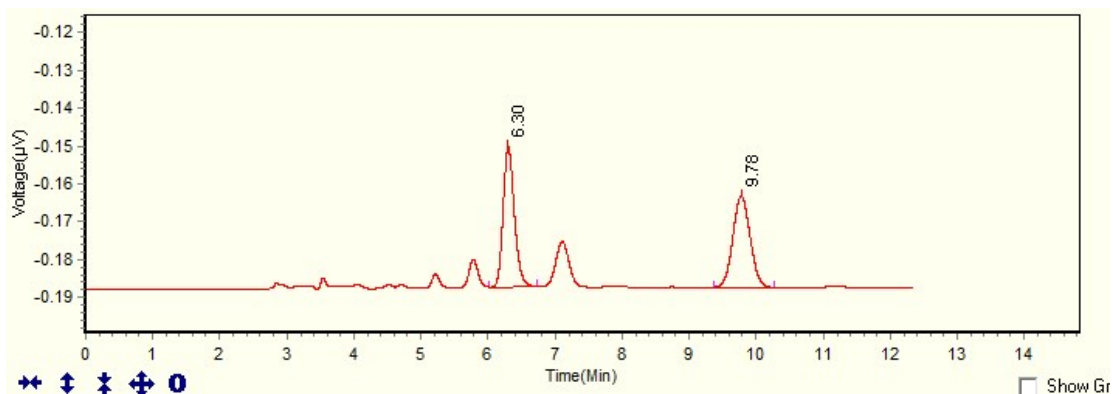

| No.   | Retention Time | Peak Area | Peak Height | Peak Area(%) | Peak Width |
|-------|----------------|-----------|-------------|--------------|------------|
| 1     | 6.30           | 215327    | 18451       | 50.00%       | 0.714      |
| 2     | 9.78           | 215311    | 12048       | 50.00%       | 0.904      |
| Total |                | 430,638   | 30,499      | 100.00%      |            |

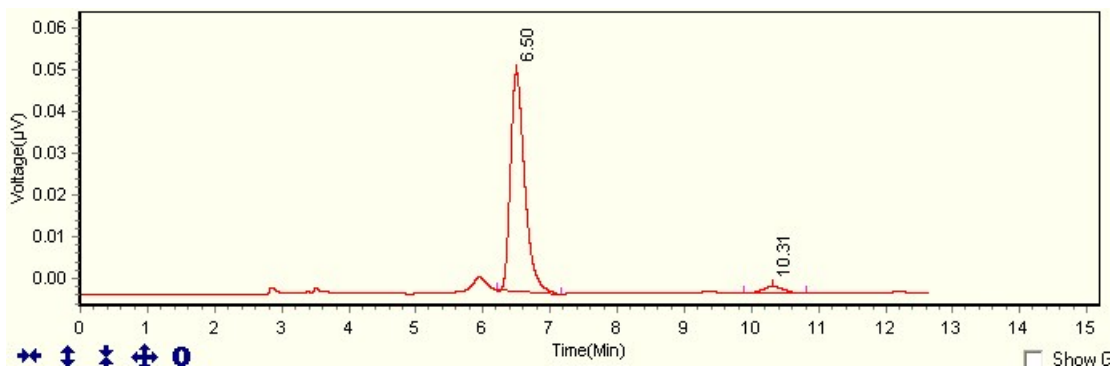

| No.   | Retention Time | Peak Area | Peak Height | Peak Area(%) | Peak Width |
|-------|----------------|-----------|-------------|--------------|------------|
| 1     | 6.50           | 391663    | 26448       | 95.87%       | 0.966      |
| 2     | 10.31          | 16869     | 795         | 4.13%        | 0.941      |
| Total |                | 408,532   | 27,243      | 100.00%      |            |

Chiralpak AS column [hexane/i-PrOH (80:20) 1 mL/min]

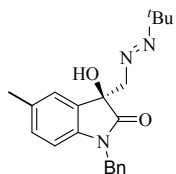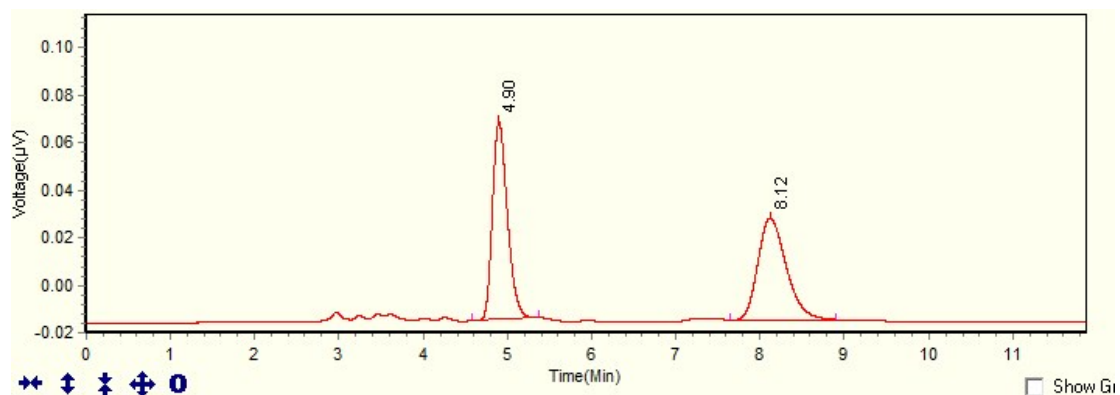

| No.   | Retention Time | Peak Area | Peak Height | Peak Area(%) | Peak Width |
|-------|----------------|-----------|-------------|--------------|------------|
| 1     | 4.90           | 512584    | 41621       | 50.54%       | 0.794      |
| 2     | 8.12           | 501609    | 21446       | 49.46%       | 1.255      |
| Total |                | 1,014,193 | 63,067      | 100.00%      |            |

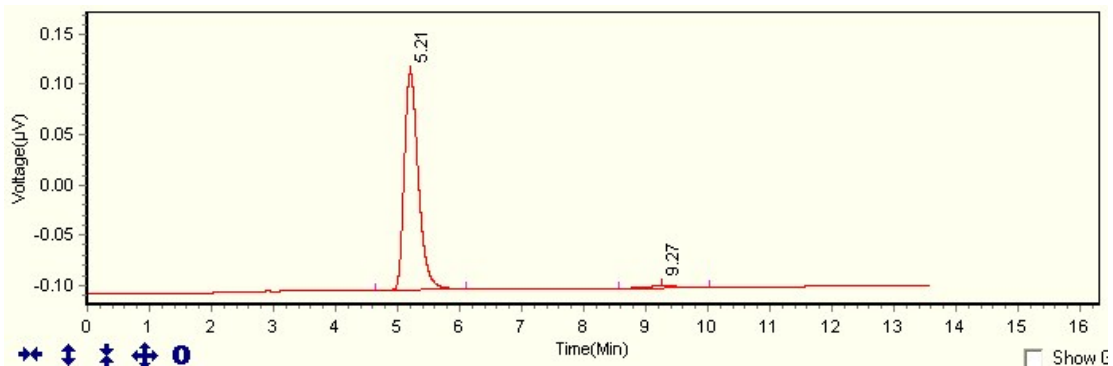

| No.   | Retention Time | Peak Area | Peak Height | Peak Area(%) | Peak Width |
|-------|----------------|-----------|-------------|--------------|------------|
| 1     | 5.21           | 1712510   | 108236      | 98.35%       | 1.463      |
| 2     | 9.27           | 28700     | 907         | 1.65%        | 1.462      |
| Total |                | 1,741,210 | 109,143     | 100.00%      |            |

Chiralpak AS column [hexane/i-PrOH (80:20) 1 mL/min]

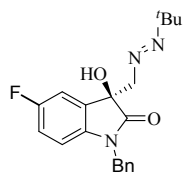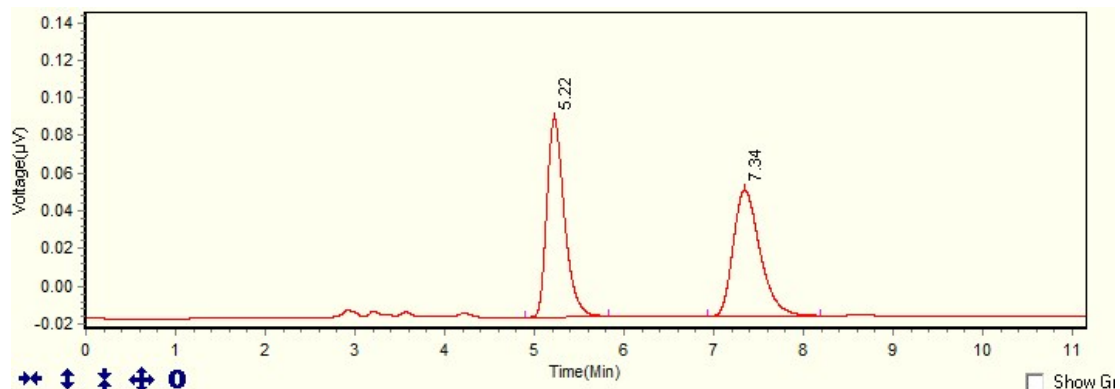

| No.   | Retention Time | Peak Area | Peak Height | Peak Area(%) | Peak Width |
|-------|----------------|-----------|-------------|--------------|------------|
| 1     | 5.22           | 713879    | 52500       | 50.50%       | 0.931      |
| 2     | 7.34           | 699777    | 33516       | 49.50%       | 1.258      |
| Total |                | 1,413,656 | 86,016      | 100.00%      |            |

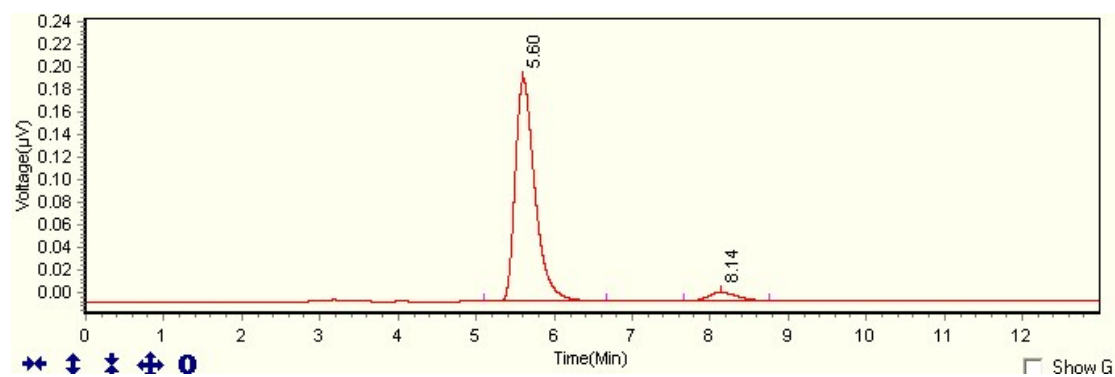

| No.   | Retention Time | Peak Area | Peak Height | Peak Area(%) | Peak Width |
|-------|----------------|-----------|-------------|--------------|------------|
| 1     | 5.60           | 1713108   | 98008       | 94.68%       | 1.561      |
| 2     | 8.14           | 96185     | 3763        | 5.32%        | 1.091      |
| Total |                | 1,809,293 | 101,771     | 100.00%      |            |

Chiralpak AS column [hexane/i-PrOH (95:5) 1 mL/min]

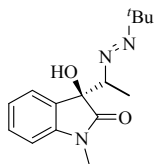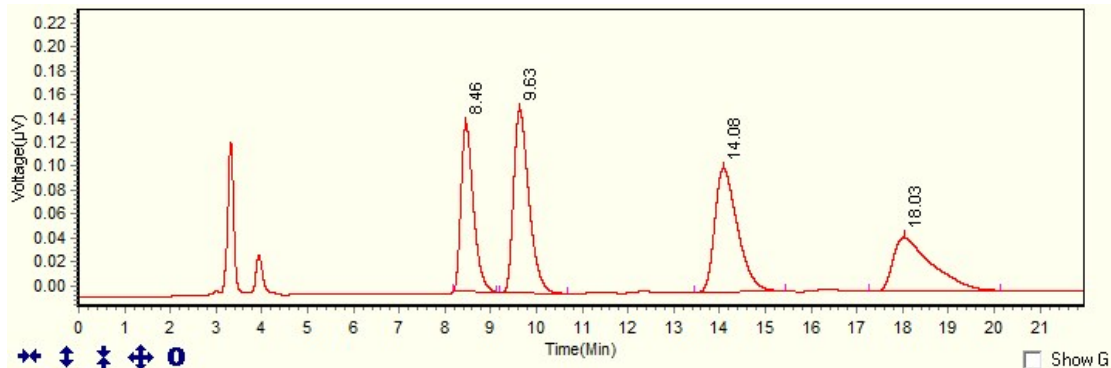

| No.   | Retention Time | PeakArea  | Peak Height | PeakArea(%) | Peak Width |
|-------|----------------|-----------|-------------|-------------|------------|
| 1     | 8.46           | 1325568   | 70069       | 21.30%      | 0.933      |
| 2     | 9.63           | 1792352   | 76791       | 28.80%      | 1.46       |
| 3     | 14.08          | 1795835   | 51954       | 28.86%      | 1.987      |
| 4     | 18.03          | 1309296   | 22449       | 21.04%      | 2.879      |
| Total |                | 6,223,051 | 221,263     | 100.00%     |            |

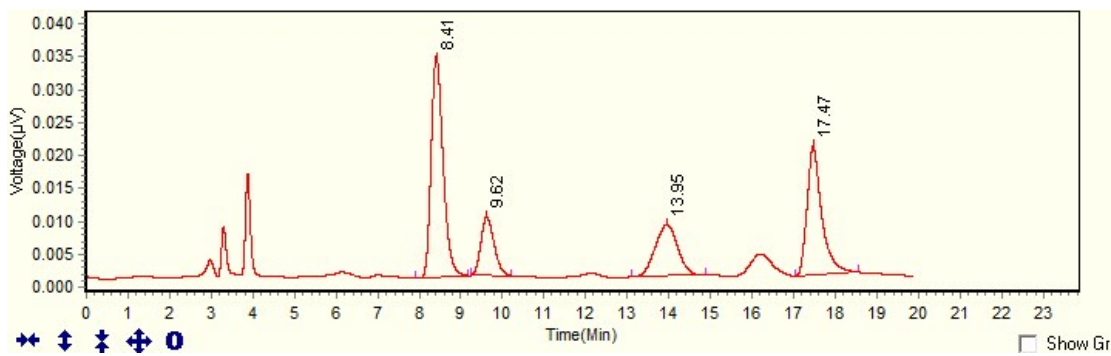

| No.   | Retention Time | PeakArea | Peak Height | PeakArea(%) | Peak Width |
|-------|----------------|----------|-------------|-------------|------------|
| 1     | 8.41           | 334659   | 16801       | 40.84%      | 1.262      |
| 2     | 9.62           | 97856    | 4434        | 11.94%      | 0.965      |
| 3     | 13.95          | 146399   | 3908        | 17.86%      | 1.782      |
| 4     | 17.47          | 240570   | 9781        | 29.36%      | 1.522      |
| Total |                | 819,484  | 34,924      | 100.00%     |            |

Chiralpak OD-H column [hexane/i-PrOH (98:2) 0.5 mL/min]

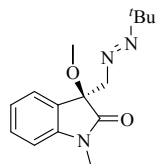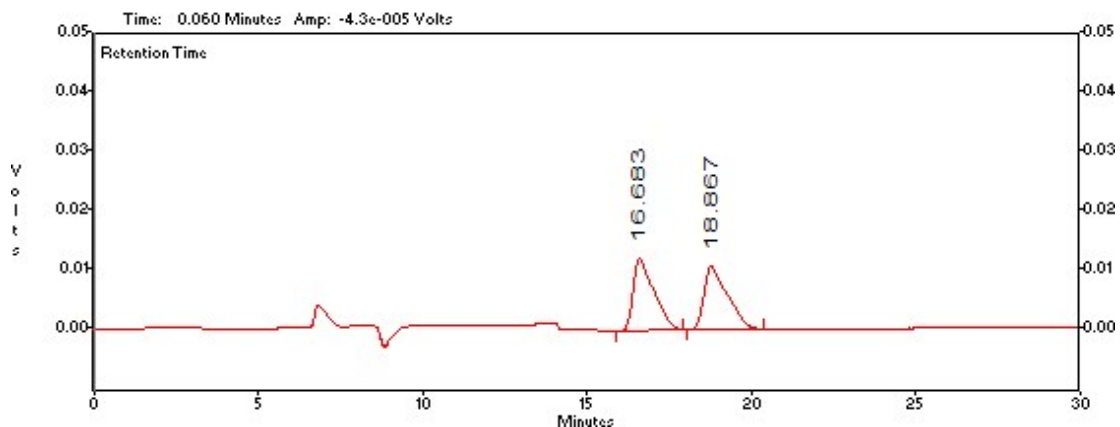

| Pkno          | Ret. Time | Area           | Area%          | Height       | Height%        | Flags |
|---------------|-----------|----------------|----------------|--------------|----------------|-------|
| 1             | 16.683    | 513346         | 50.293         | 12245        | 53.796         | MM    |
| 2             | 18.867    | 507356         | 49.707         | 10517        | 46.204         | MM    |
| <b>Totals</b> |           | <b>1020702</b> | <b>100.000</b> | <b>22761</b> | <b>100.000</b> |       |

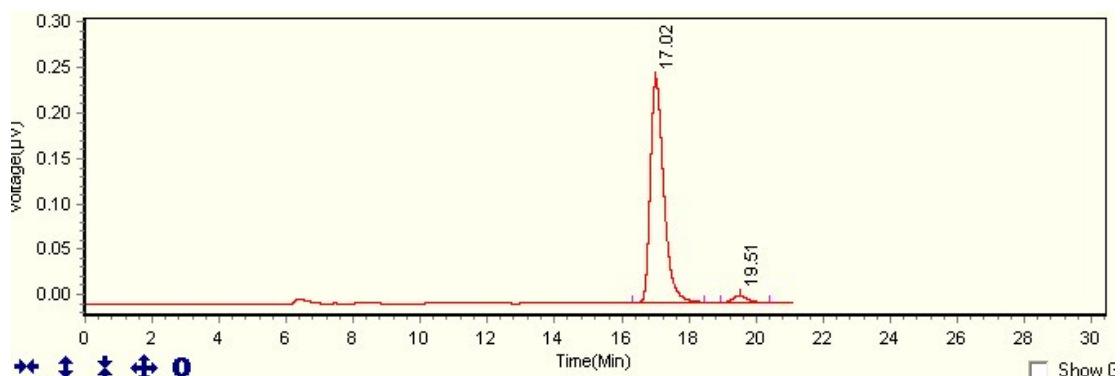

| No.   | Retention Time | Peak Area | Peak Height | Peak Area(%) | Peak Width |
|-------|----------------|-----------|-------------|--------------|------------|
| 1     | 17.02          | 3404109   | 122700      | 96.84%       | 2.143      |
| 2     | 19.51          | 111209    | 3721        | 3.16%        | 1.461      |
| Total |                | 3,515,318 | 126,421     | 100.00%      |            |



Chiralpak AD column [hexane/*i*-PrOH (98:2) 0.8 mL/min]

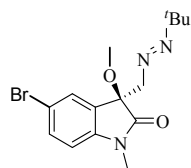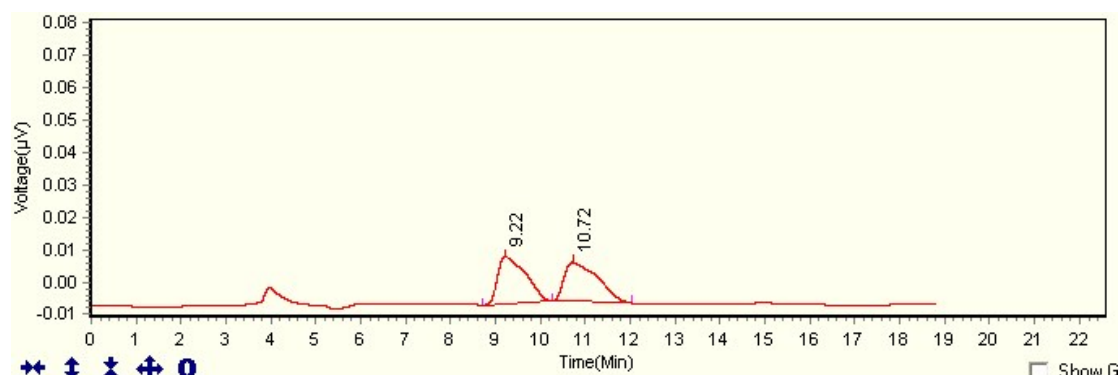

| No.   | Retention Time | Peak Area | Peak Height | Peak Area(%) | Peak Width |
|-------|----------------|-----------|-------------|--------------|------------|
| 1     | 10.72          | 317550    | 6100        | 50.48%       | 1.771      |
| 2     | 9.22           | 311501    | 7248        | 49.52%       | 1.555      |
| Total |                | 629,051   | 13,348      | 100.00%      |            |

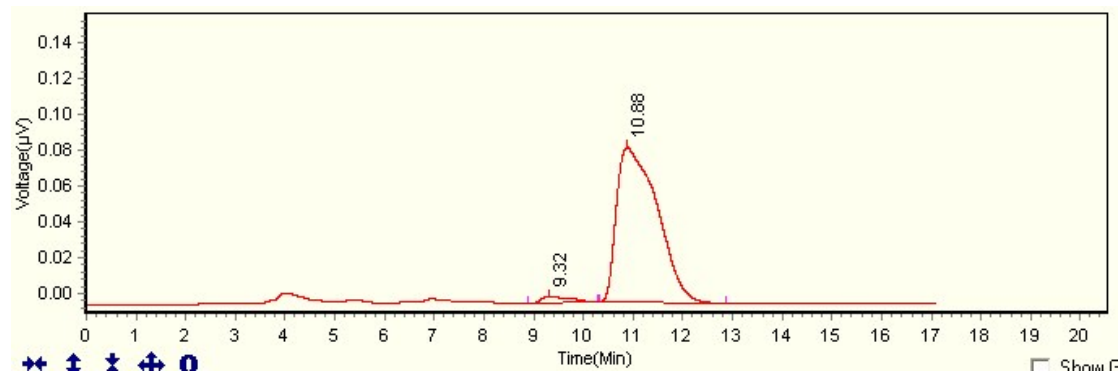

| No.   | Retention Time | Peak Area | Peak Height | Peak Area(%) | Peak Width |
|-------|----------------|-----------|-------------|--------------|------------|
| 1     | 9.32           | 77393     | 1815        | 3.03%        | 1.404      |
| 2     | 10.88          | 2478637   | 43408       | 96.97%       | 2.548      |
| Total |                | 2,556,030 | 45,223      | 100.00%      |            |

<sup>1</sup>H NMR spectrum of **3aa** (CDCl<sub>3</sub>, 400 MHz)

2021WMC.1160.fid  
wh-8  
1H  
CDCl<sub>3</sub>  
2021WMC-1160

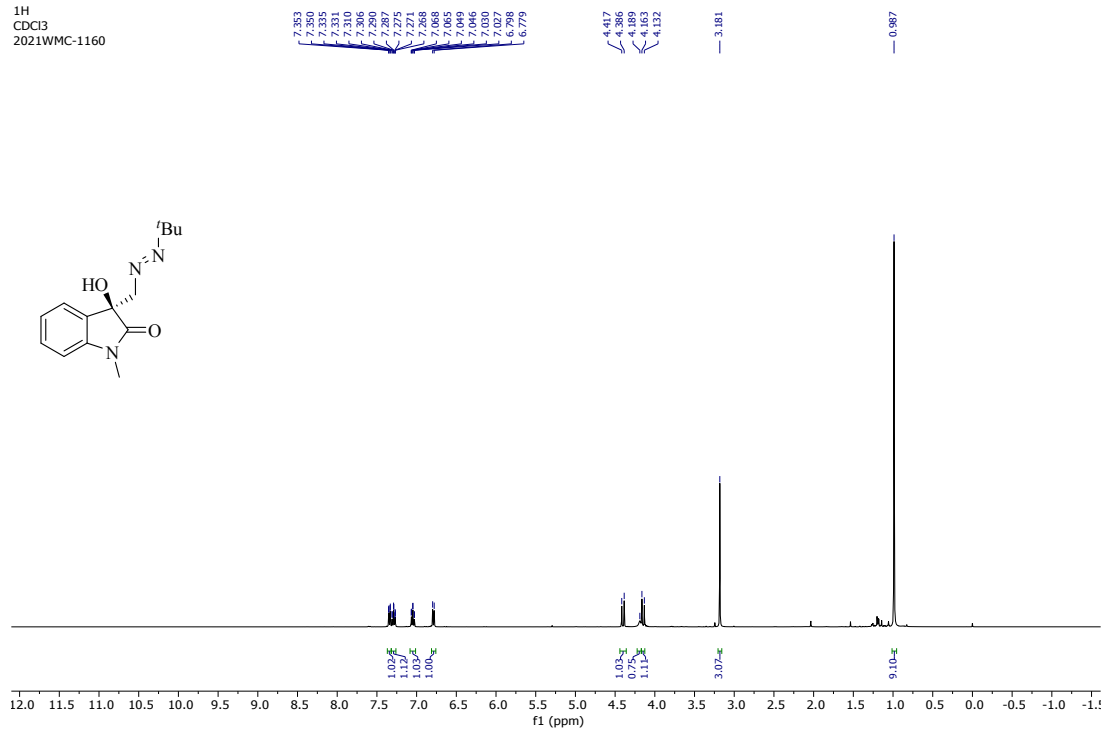

<sup>13</sup>C NMR spectrum of **3aa** (CDCl<sub>3</sub>, 100 MHz)

2021WMC.1161.fid  
wh-8  
13C  
CDCl<sub>3</sub>  
2021WMC-1160

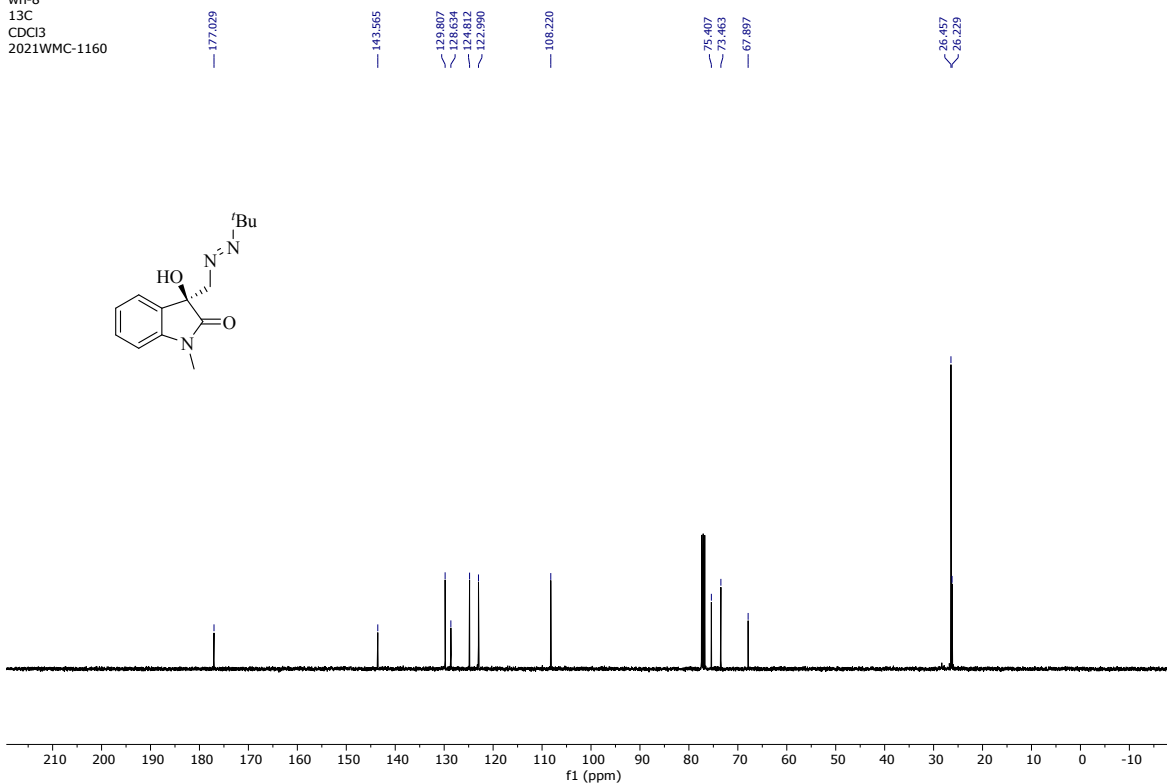

<sup>1</sup>H NMR spectrum of **3ba** (DMSO-d, 400 MHz)

2021WMC.1150.fid  
wh-12  
1H  
DMSO  
2021WMC-1150

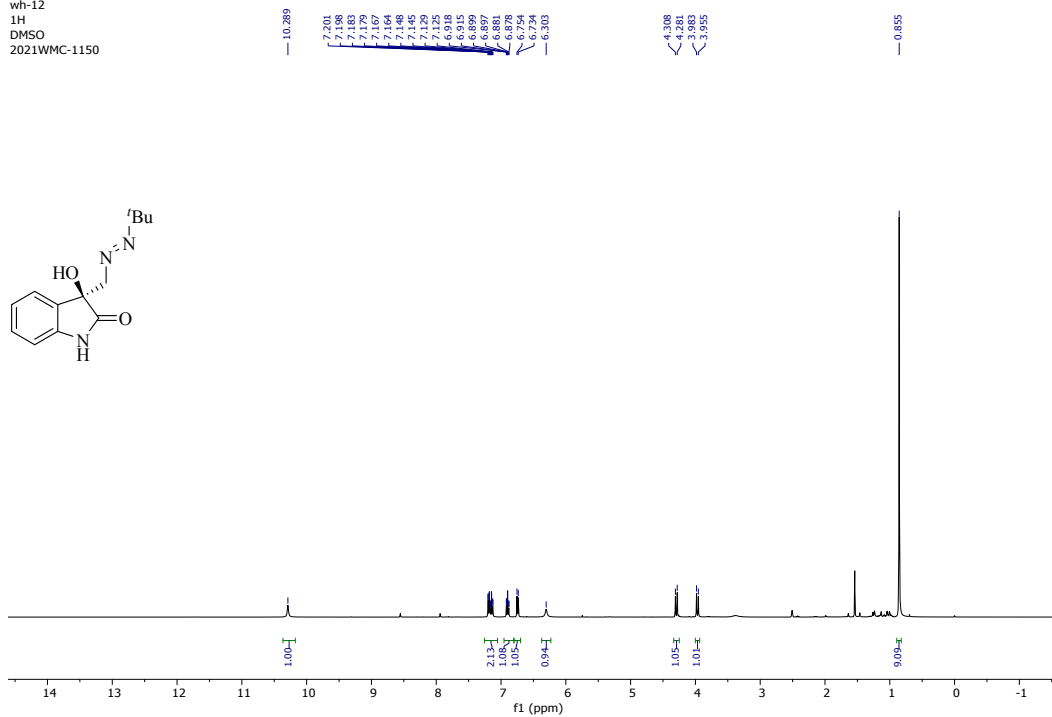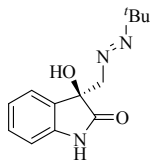

<sup>13</sup>C NMR spectrum of **3ba** (DMSO-d, 100 MHz)

2021WMC.1152.fid  
wh-12  
13C  
DMSO  
2021WMC-1152

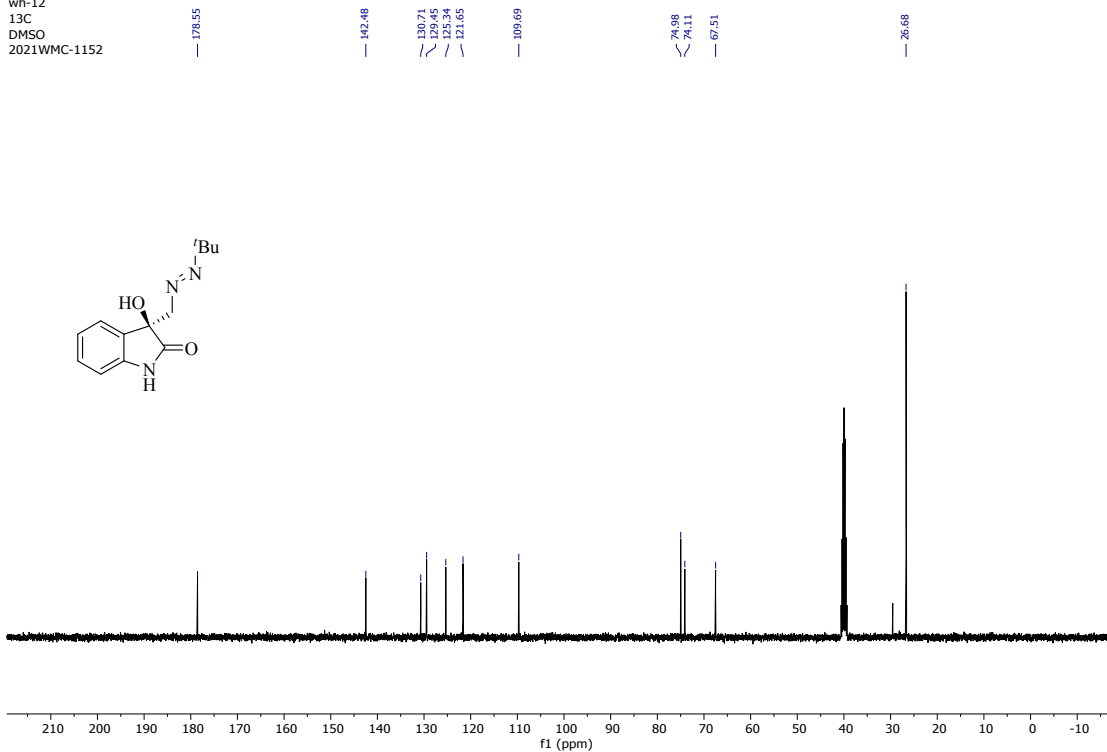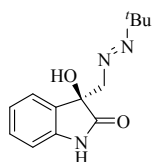

<sup>1</sup>H NMR spectrum of **3a** (CDCl<sub>3</sub>, 400 MHz)

WMC14-1301-1304.1302.fid  
hu-34  
1H  
CDCl3  
1302/WMC14

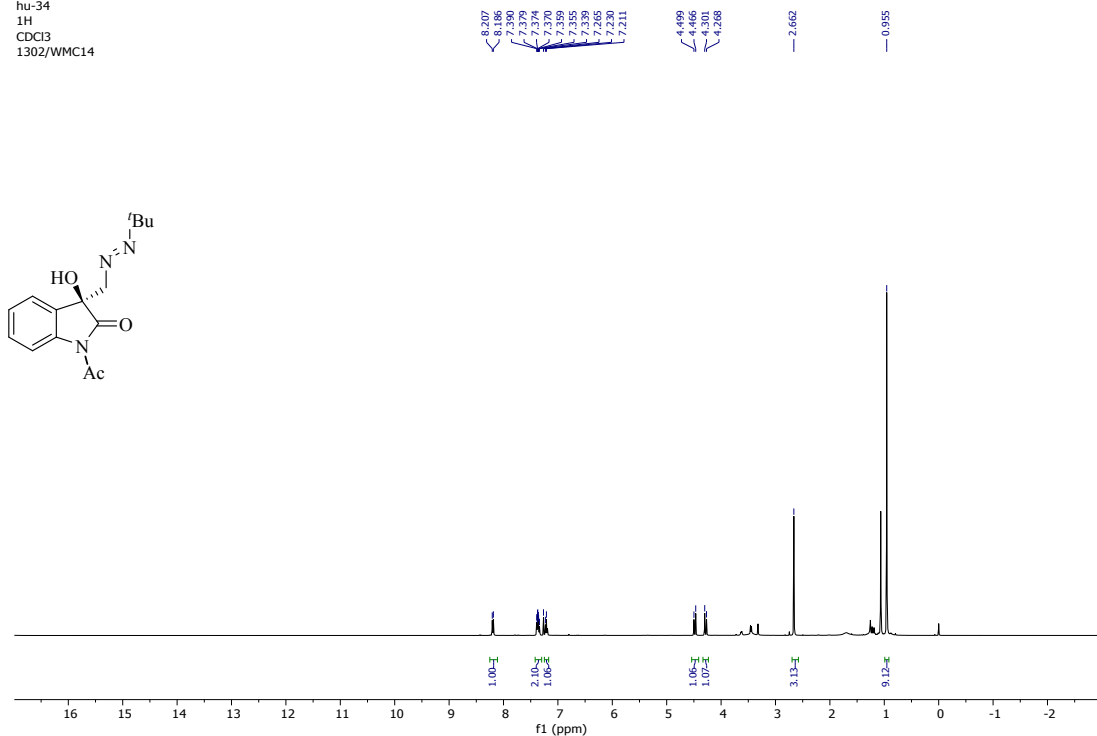

<sup>13</sup>C NMR spectrum of **3a** (CDCl<sub>3</sub>, 100 MHz)

WMC14-1305-1306.1305.fid  
hu-34  
13C  
CDCl3  
1304/WMC14

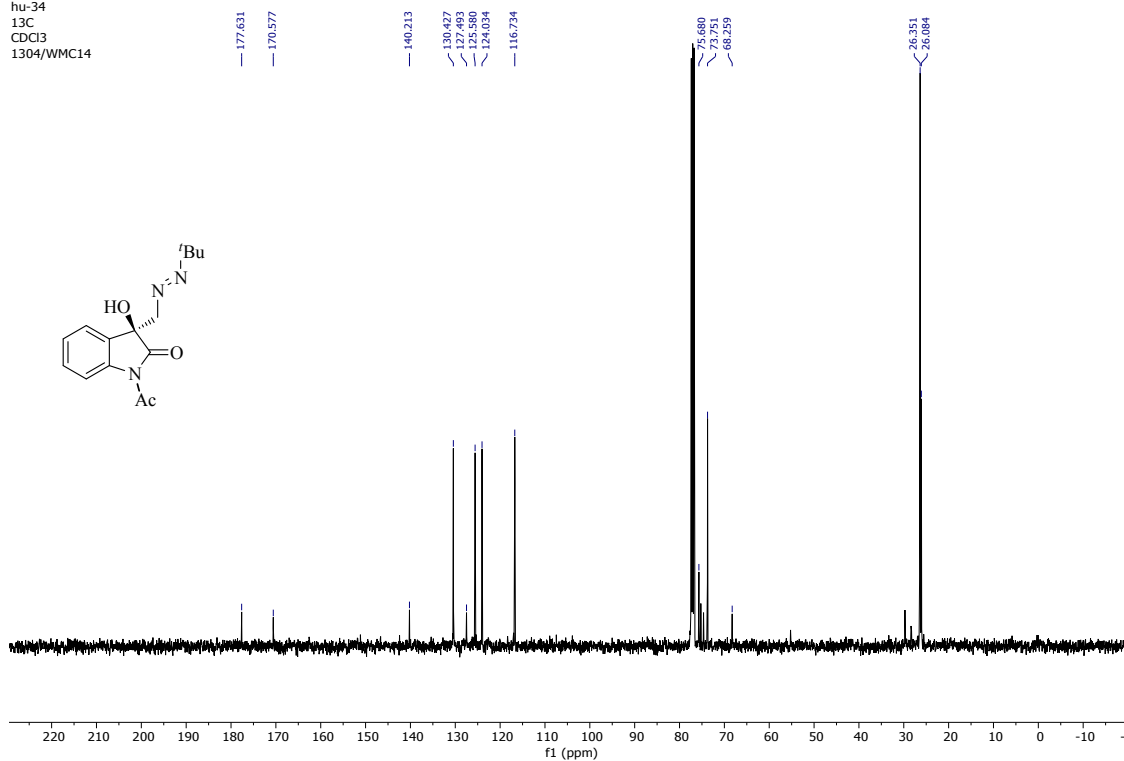

<sup>1</sup>H NMR spectrum of **3da** (CDCl<sub>3</sub>, 400 MHz)

2021WMC.1140.fid  
wh-11  
CDCl<sub>3</sub>  
2021WMC-1140

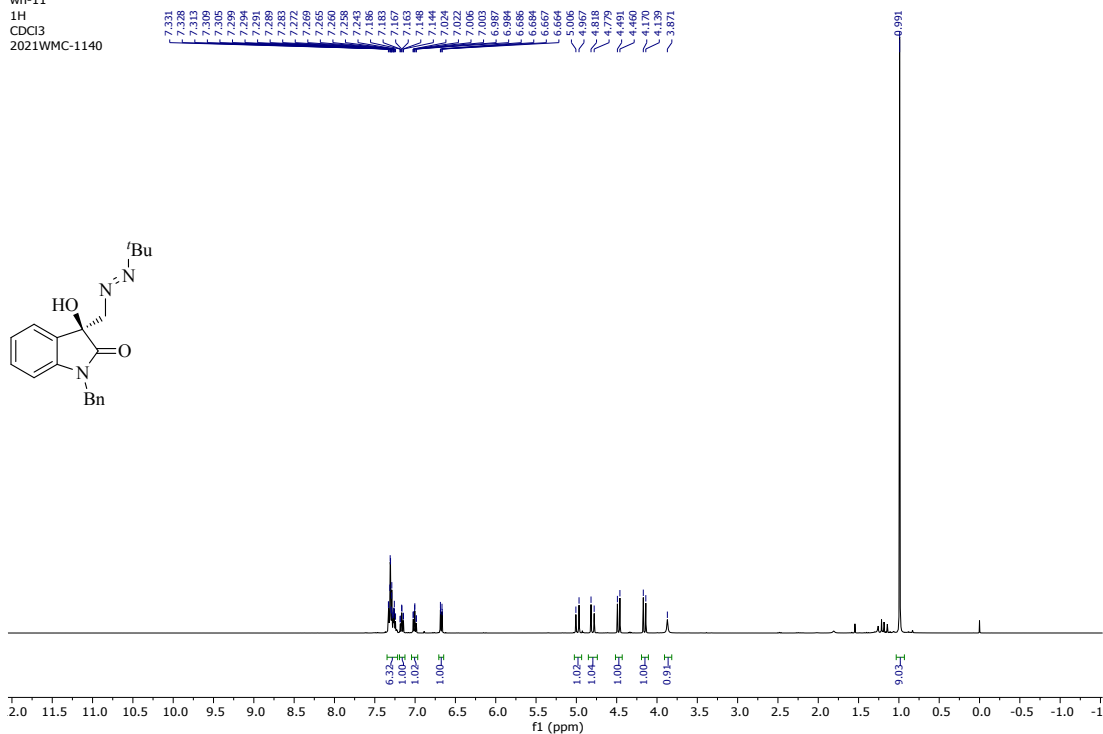

<sup>13</sup>C NMR spectrum of **3da** (CDCl<sub>3</sub>, 100 MHz)

2021WMC.1141.fid  
wh-11  
13C  
CDCl<sub>3</sub>  
2021WMC-1141

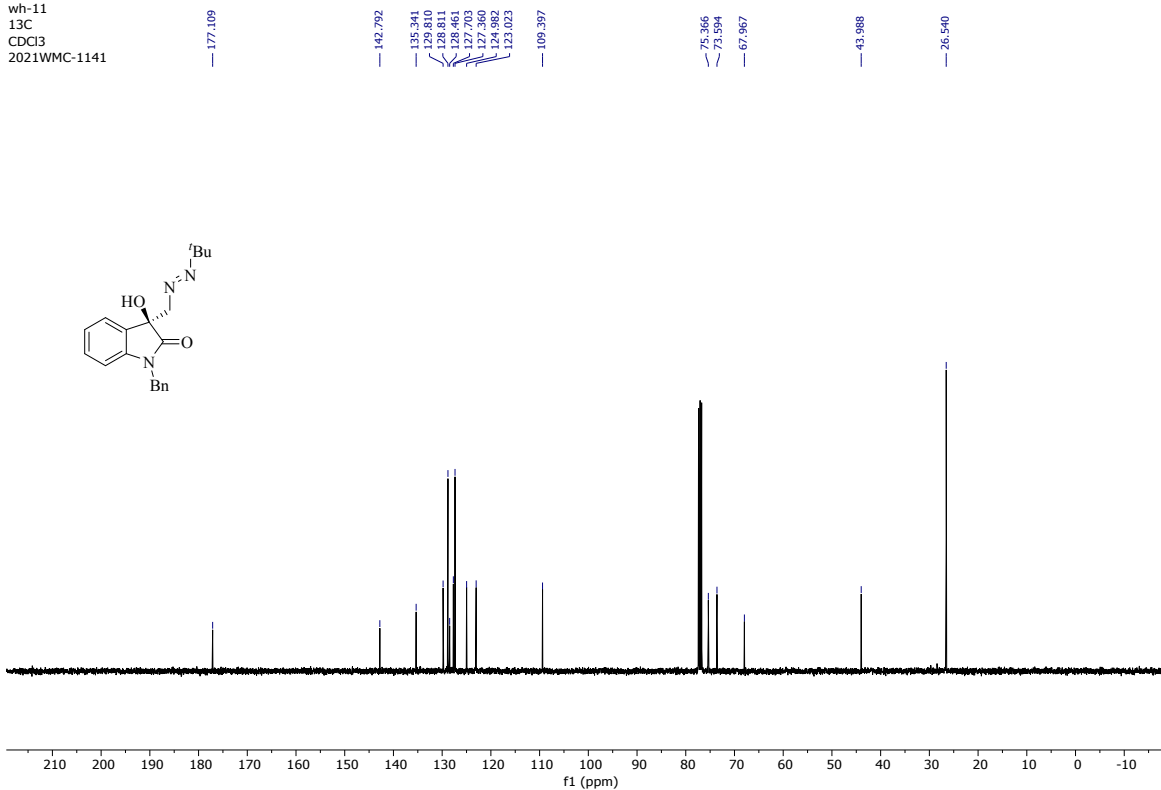

<sup>1</sup>H NMR spectrum of **3ea** (CDCl<sub>3</sub>, 400 MHz)

WMC14-1231-1233.1232.fid  
hu-37  
1H  
CDCl3  
1232/WMC08

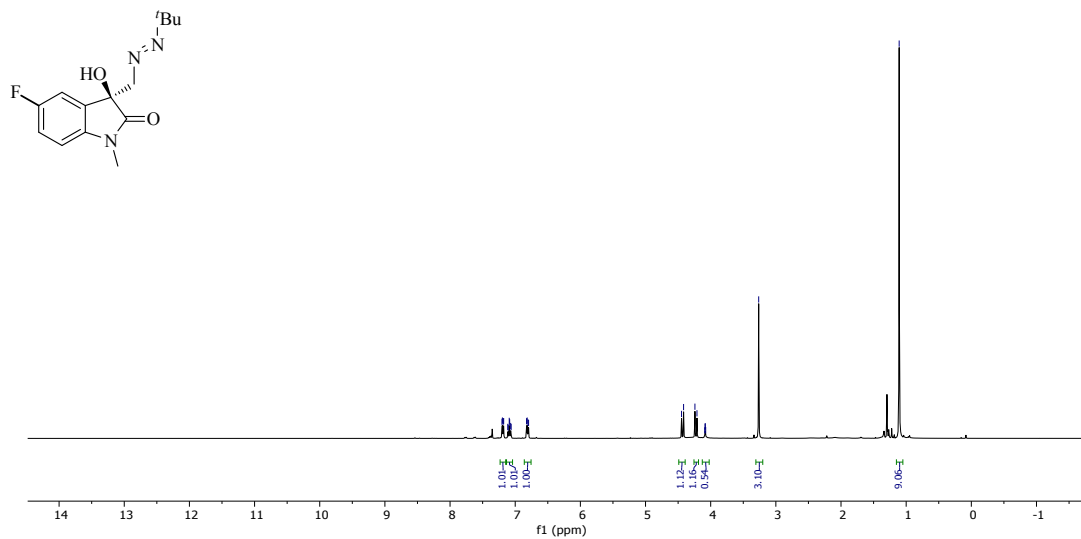

<sup>13</sup>C NMR spectrum of **3ea** (CDCl<sub>3</sub>, 100 MHz)

WMC14-1234-1235.1234.fid  
hu-37  
13C  
CDCl3  
1234/WMC14

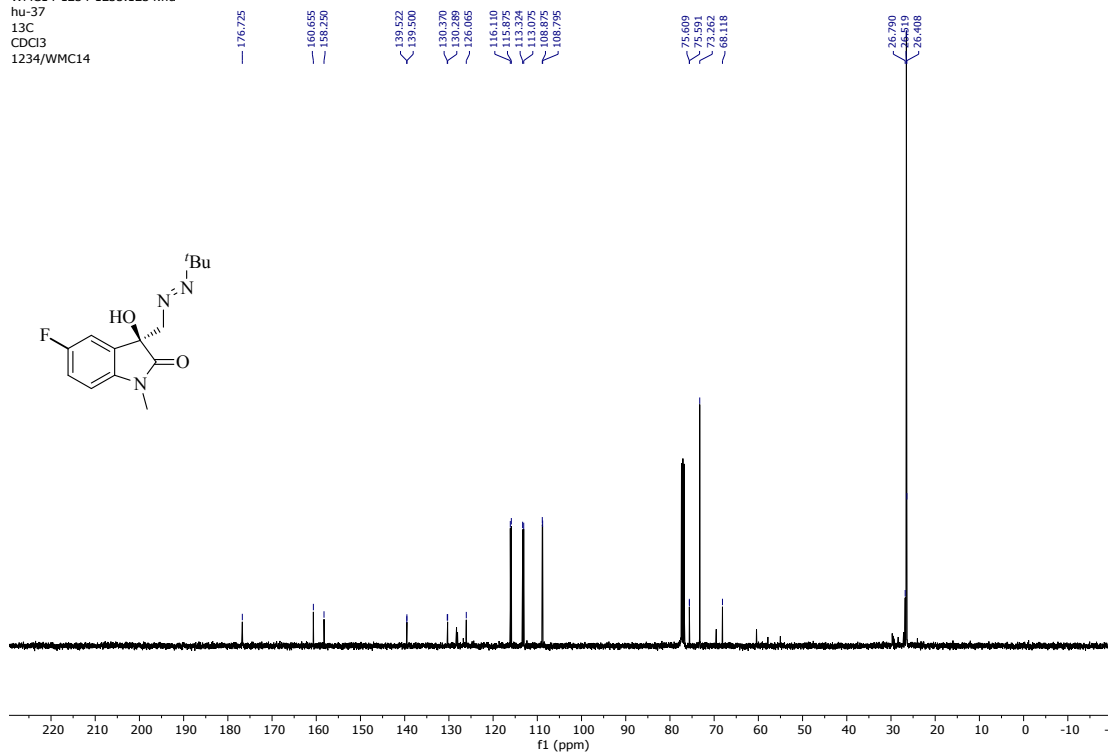

<sup>1</sup>H NMR spectrum of **3fa** (CDCl<sub>3</sub>, 400 MHz)

2021WMC.1190.fid  
WH-14  
1H  
CDCl<sub>3</sub>  
2021WMC-1190

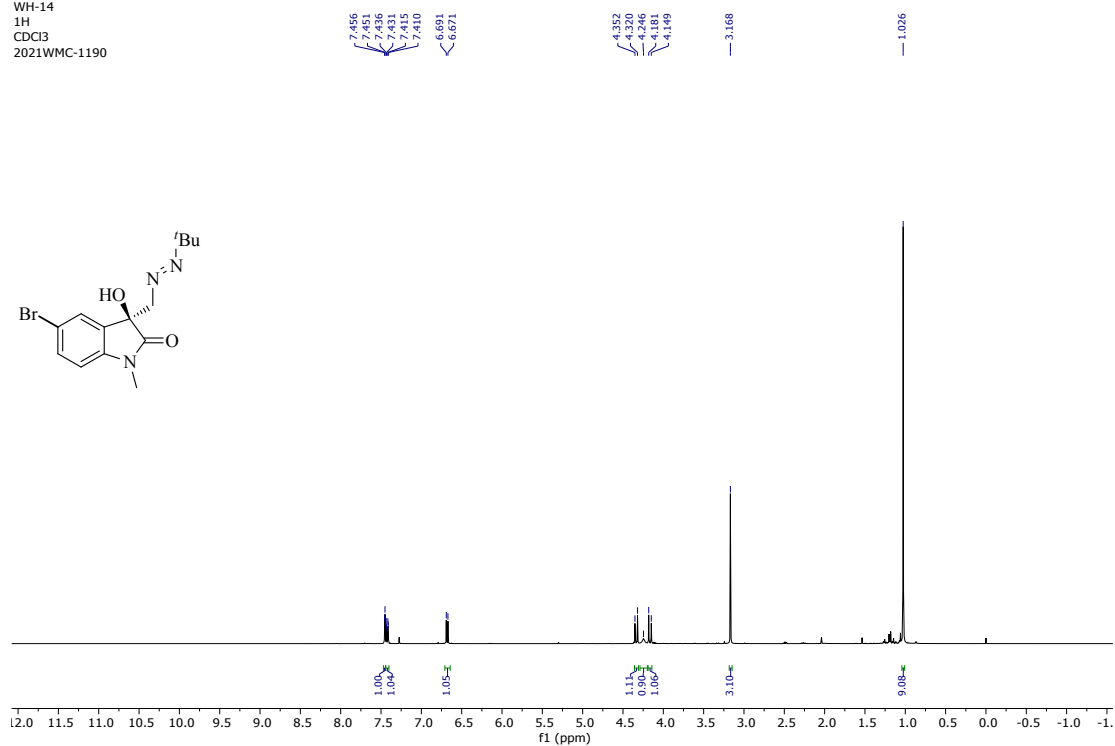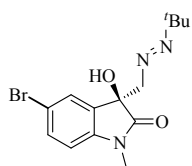

<sup>13</sup>C NMR spectrum of **3fa** (CDCl<sub>3</sub>, 100 MHz)

2021WMC.1191.fid  
WH-14  
1H  
CDCl<sub>3</sub>  
2021WMC-1190

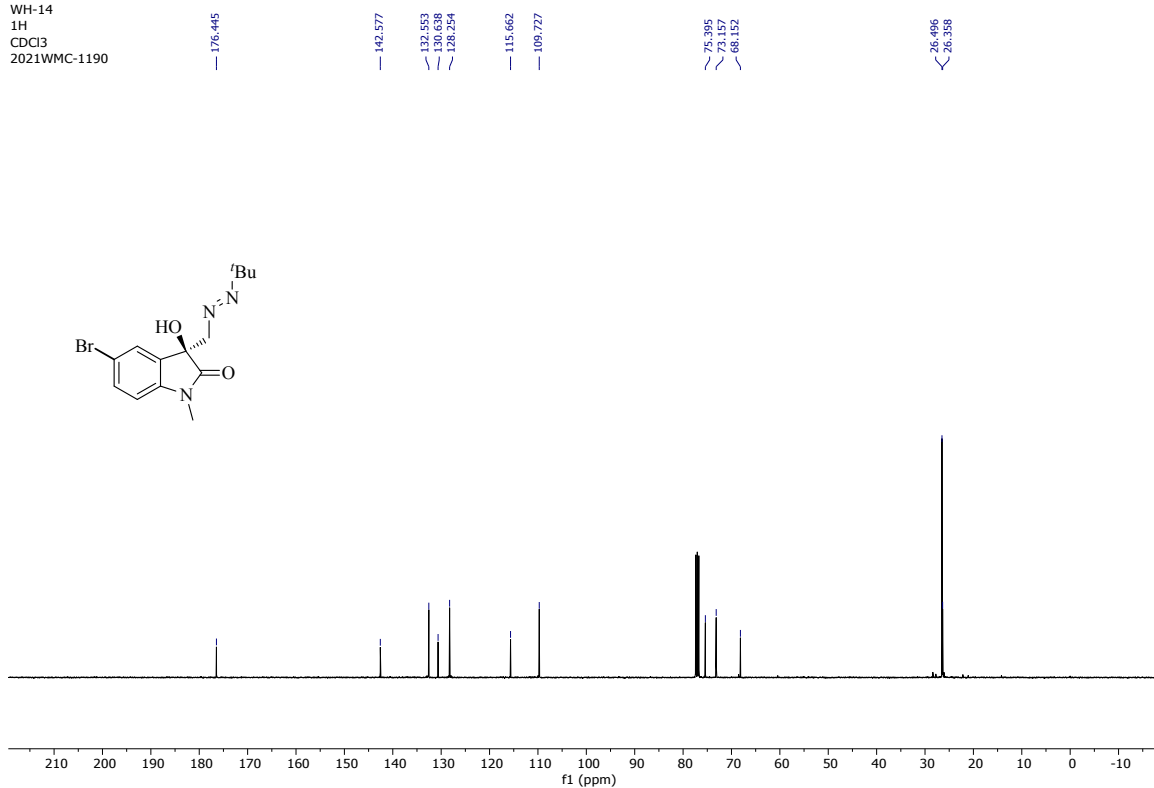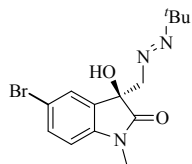

### $^1\text{H}$ NMR spectrum of **3ga** ( $\text{CDCl}_3$ , 400 MHz)

WMC14-1279-1283.1279.fid  
hu-36  
1H  
CDCl3  
1279/WMC14

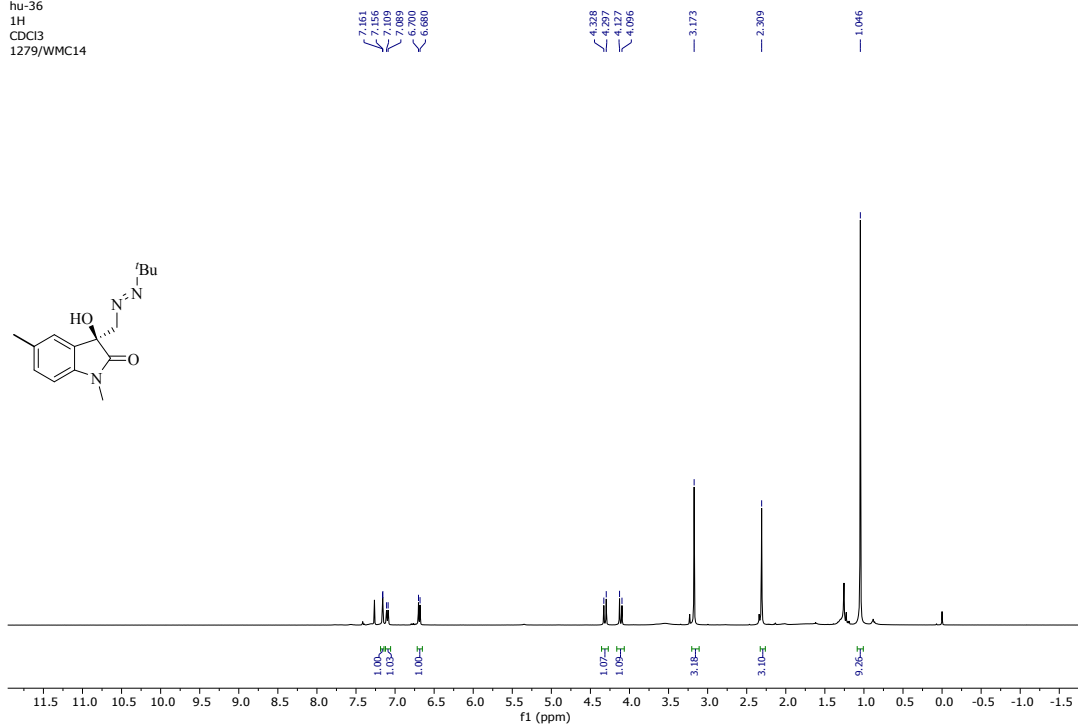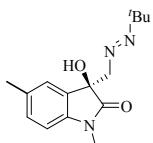

### $^{13}\text{C}$ NMR spectrum of **3ga** ( $\text{CDCl}_3$ , 100 MHz)

WMC14-1279-1283.1283.fid  
hu-36  
13C  
CDCl3  
1283/WMC14

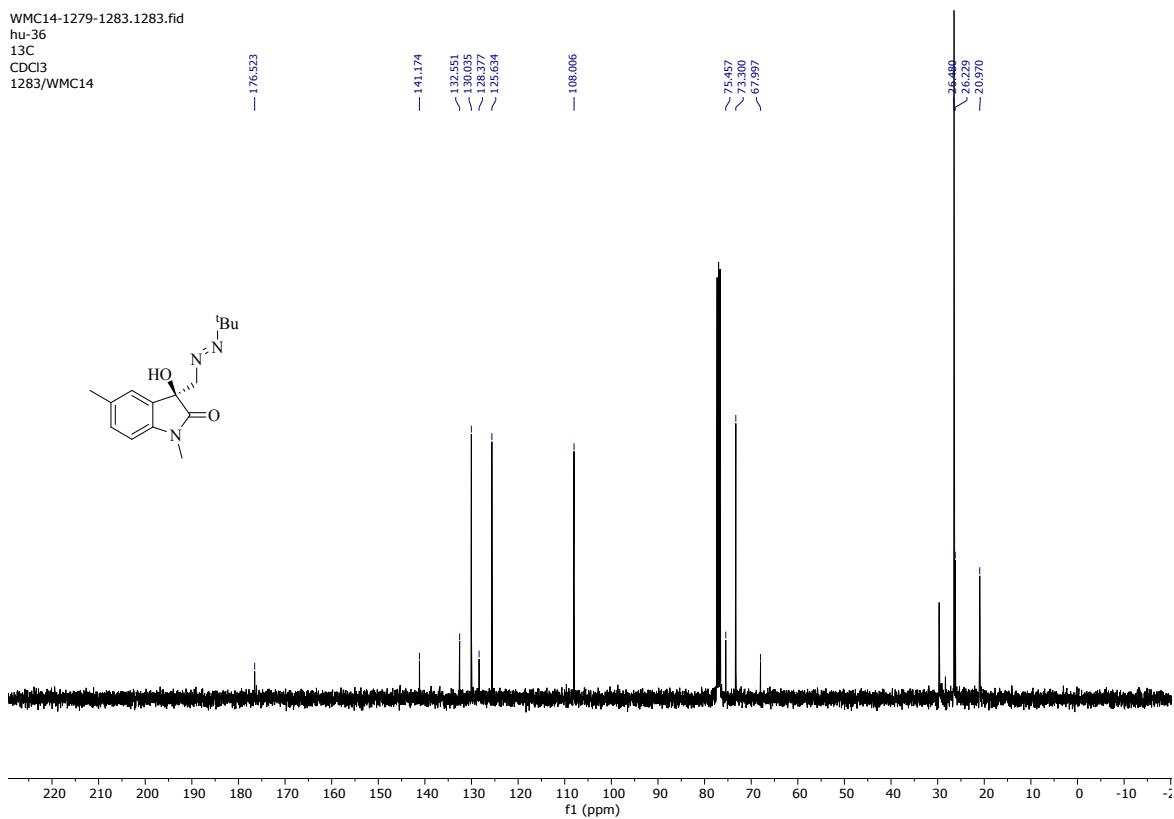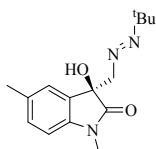



<sup>1</sup>H NMR spectrum of **3ha** (CDCl<sub>3</sub>, 400 MHz)

WMC14-1279-1283.1280.fid  
hu-41  
1H  
CDCl<sub>3</sub>  
1280/WMC14

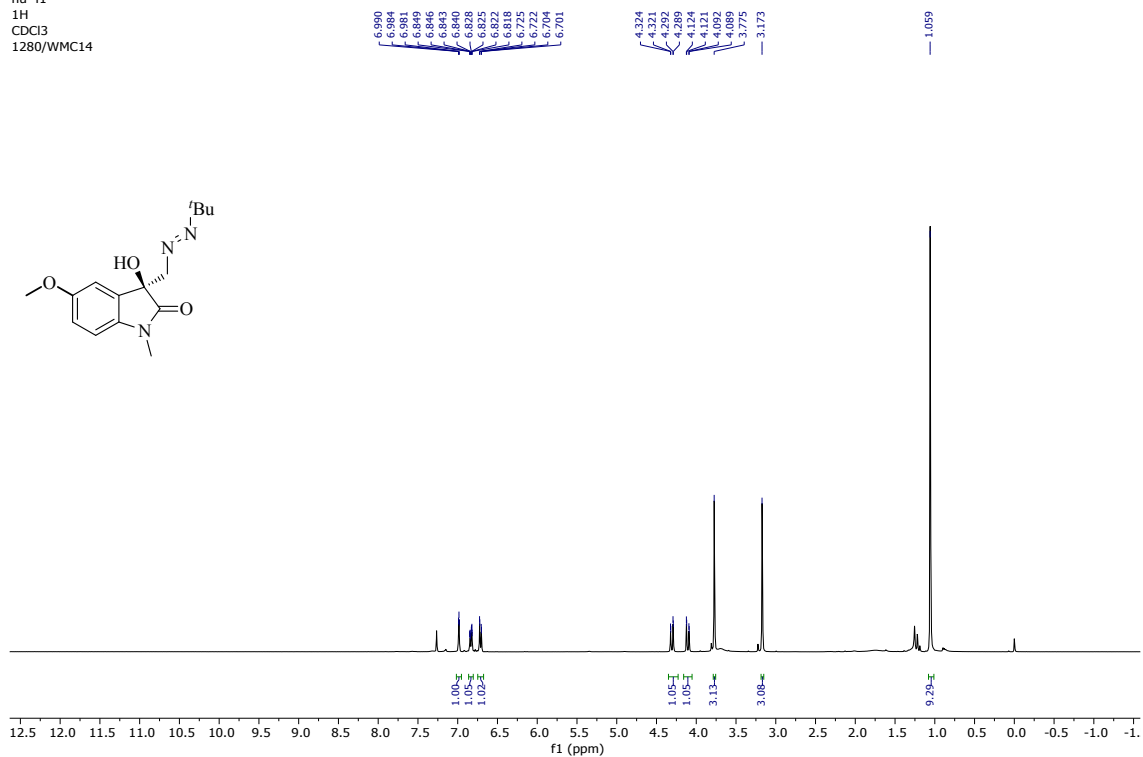

<sup>13</sup>C NMR spectrum of **3ha** (CDCl<sub>3</sub>, 100 MHz)

WMC14-1279-1283.1282.fid  
hu-41  
13C  
CDCl<sub>3</sub>  
1282/WMC14

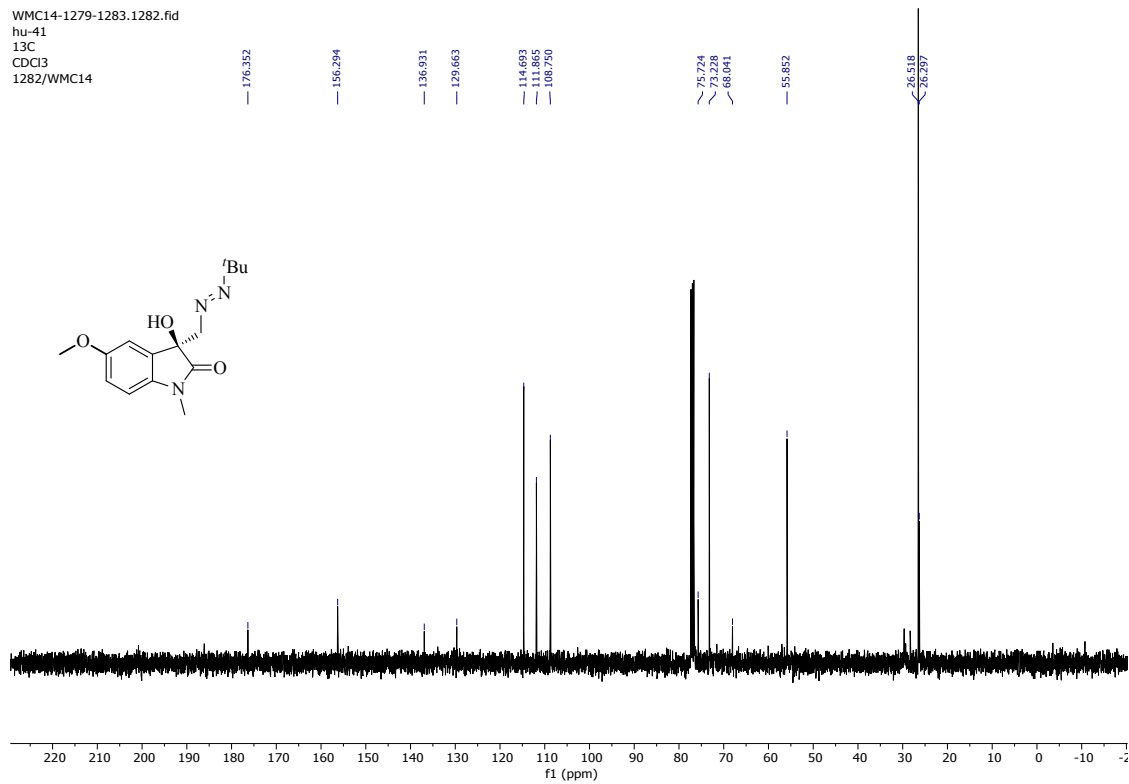

<sup>1</sup>H NMR spectrum of **3ia** (CDCl<sub>3</sub>, 400 MHz)

2021WMC.1130.fid  
wh-6  
1H  
CDCl3  
2021WMC-1130

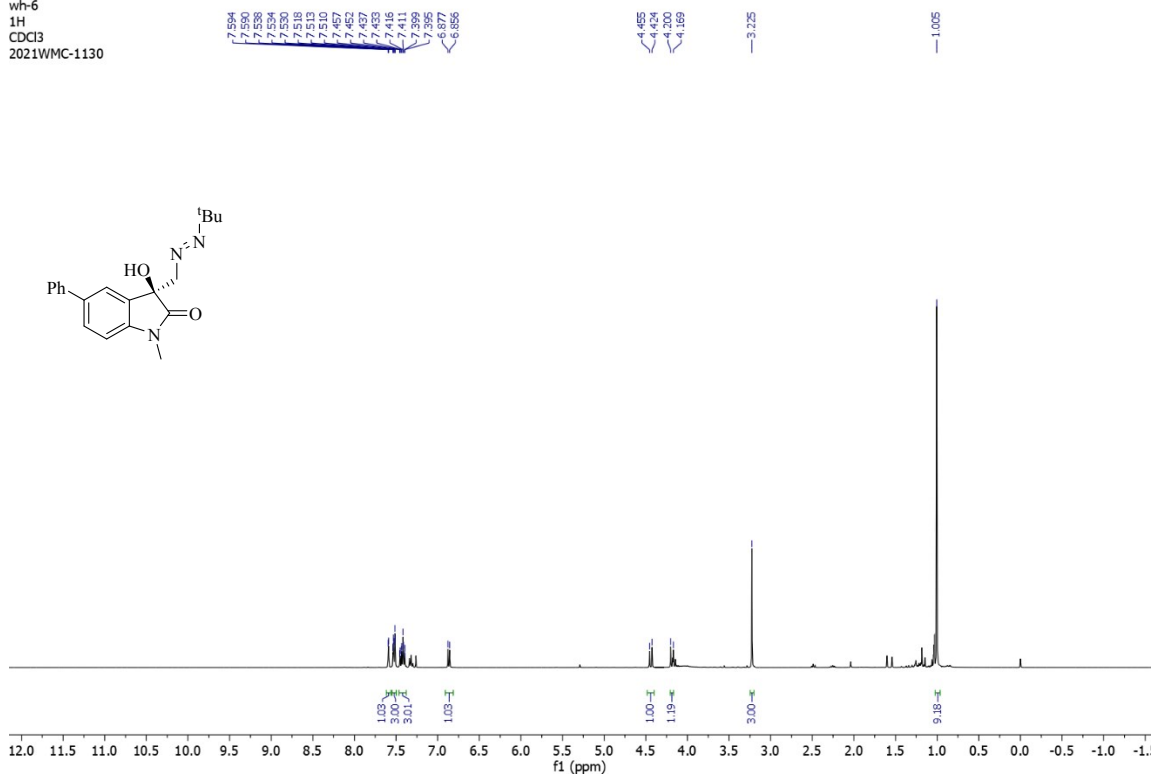

<sup>13</sup>C NMR spectrum of **3ia** (CDCl<sub>3</sub>, 100 MHz)

2021WMC.1131.fid  
wh-6  
13C  
CDCl3  
2021WMC-1131

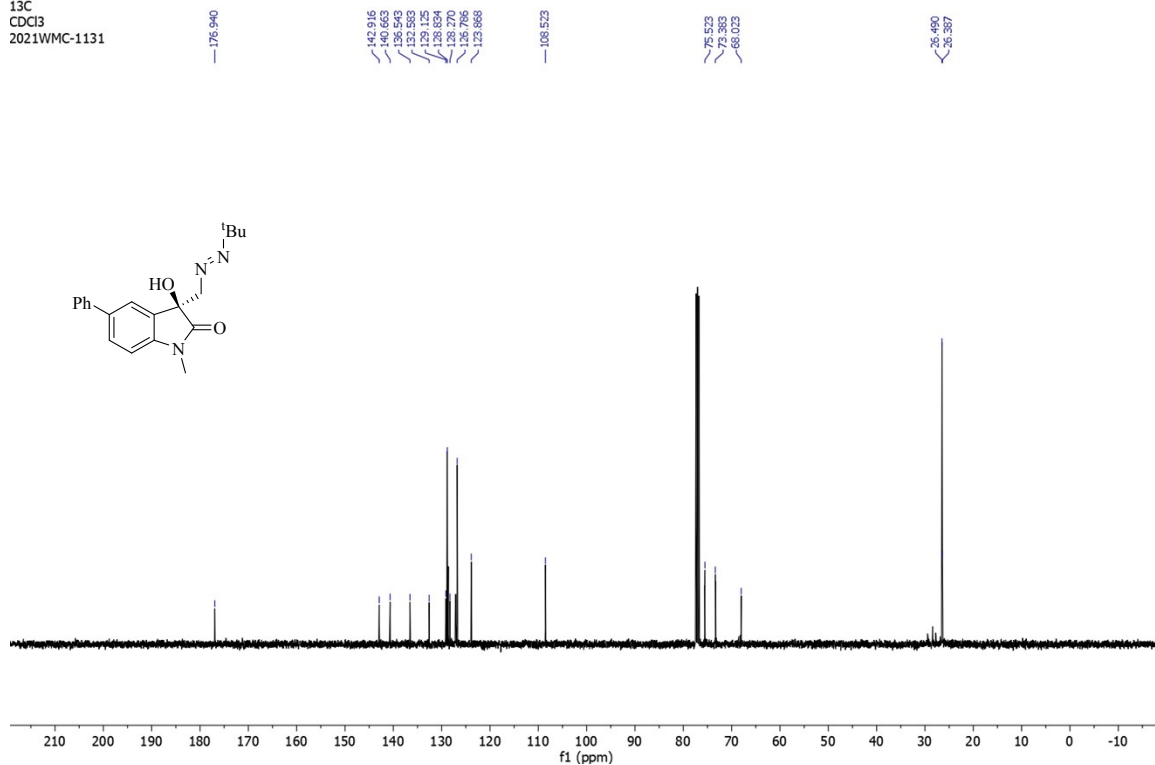

<sup>1</sup>H NMR spectrum of **3ja** (CDCl<sub>3</sub>, 400 MHz)

WMC14-1289-1294.1289.fid  
hu-42  
1H  
CDCl<sub>3</sub>  
1289/WMC14

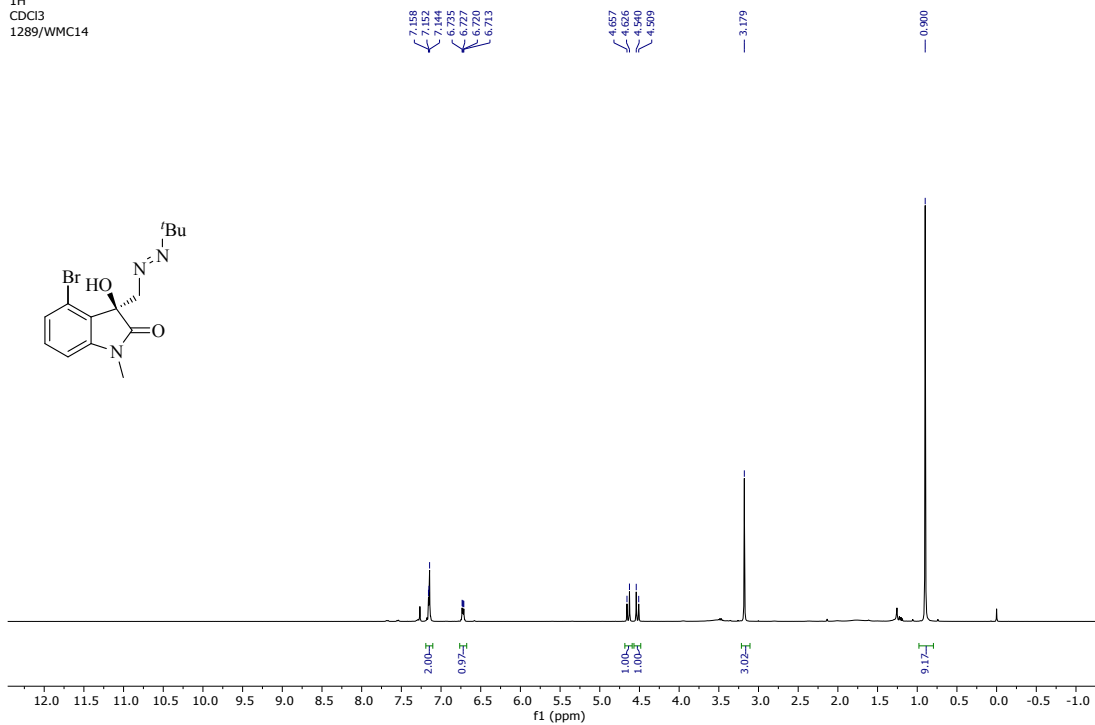

<sup>13</sup>C NMR spectrum of **3ja** (CDCl<sub>3</sub>, 100 MHz)

WMC14-1289-1294.1290.fid  
hu-42  
1H  
CDCl<sub>3</sub>  
1290/WMC14

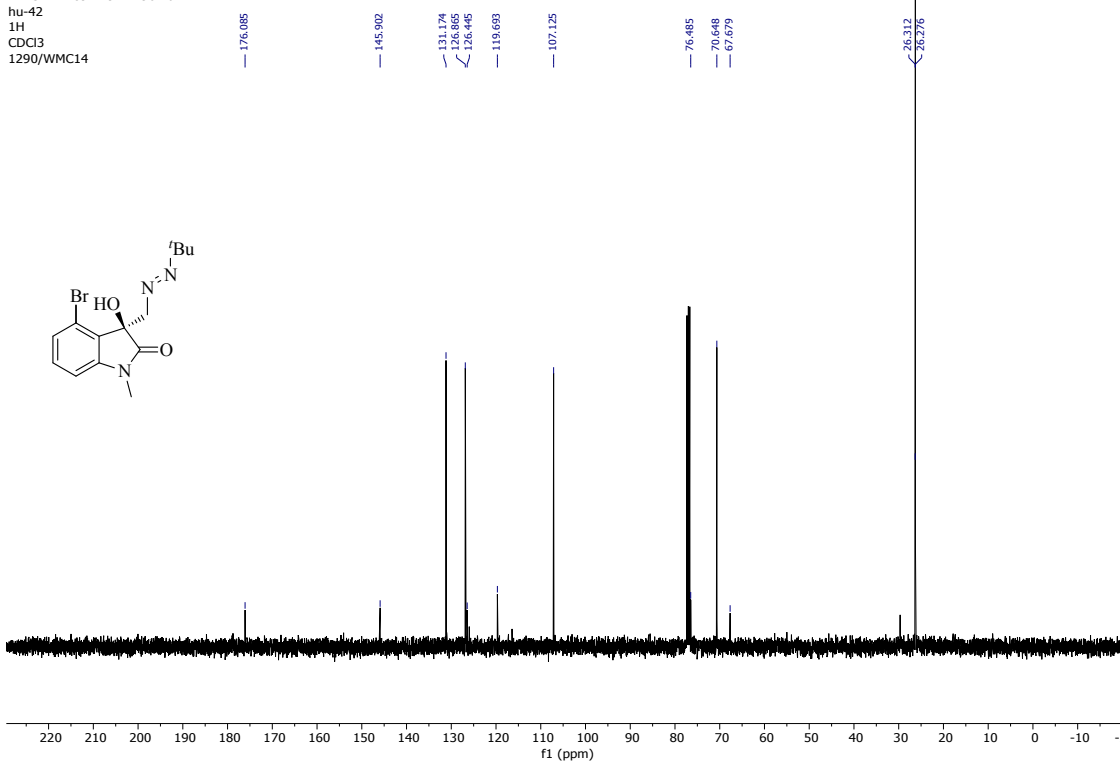

<sup>1</sup>H NMR spectrum of **3ka** (CDCl<sub>3</sub>, 400 MHz)

WMC14-1301-1304.1303.fid  
hu-44  
1H  
CDCl<sub>3</sub>  
1303/WMC14

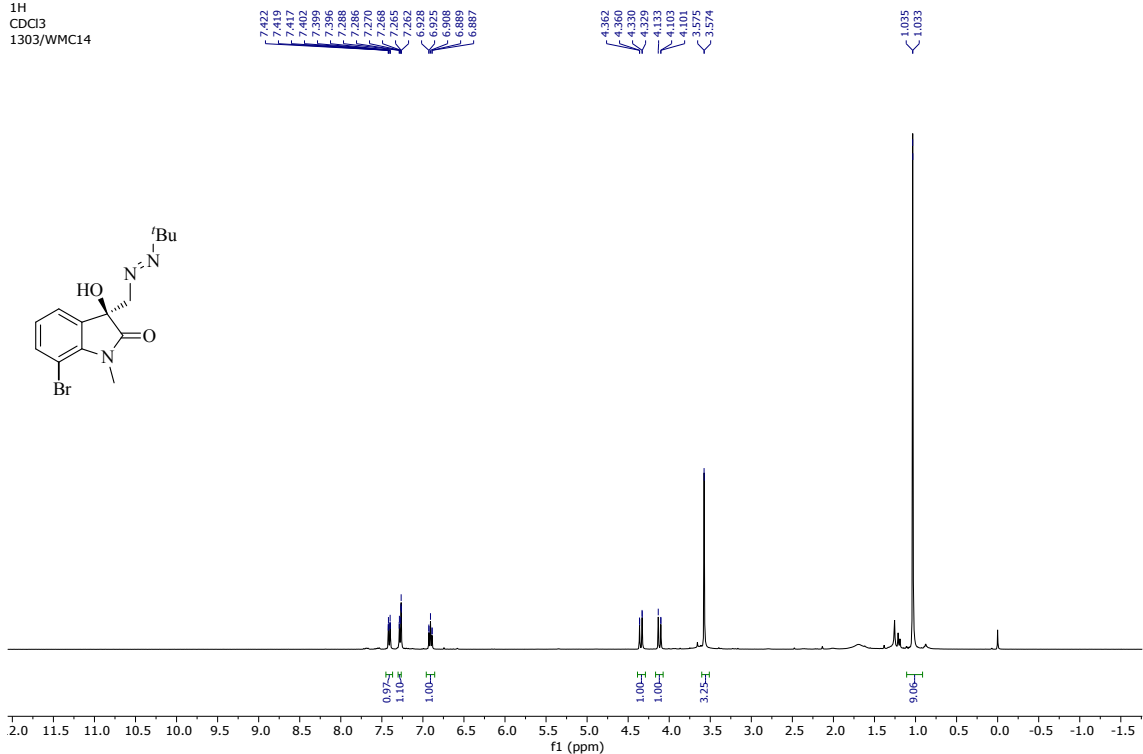

<sup>13</sup>C NMR spectrum of **3ka** (CDCl<sub>3</sub>, 100 MHz)

WMC14-1305-1306.1306.fid  
hu-44  
13C  
CDCl<sub>3</sub>  
1306/WMC14

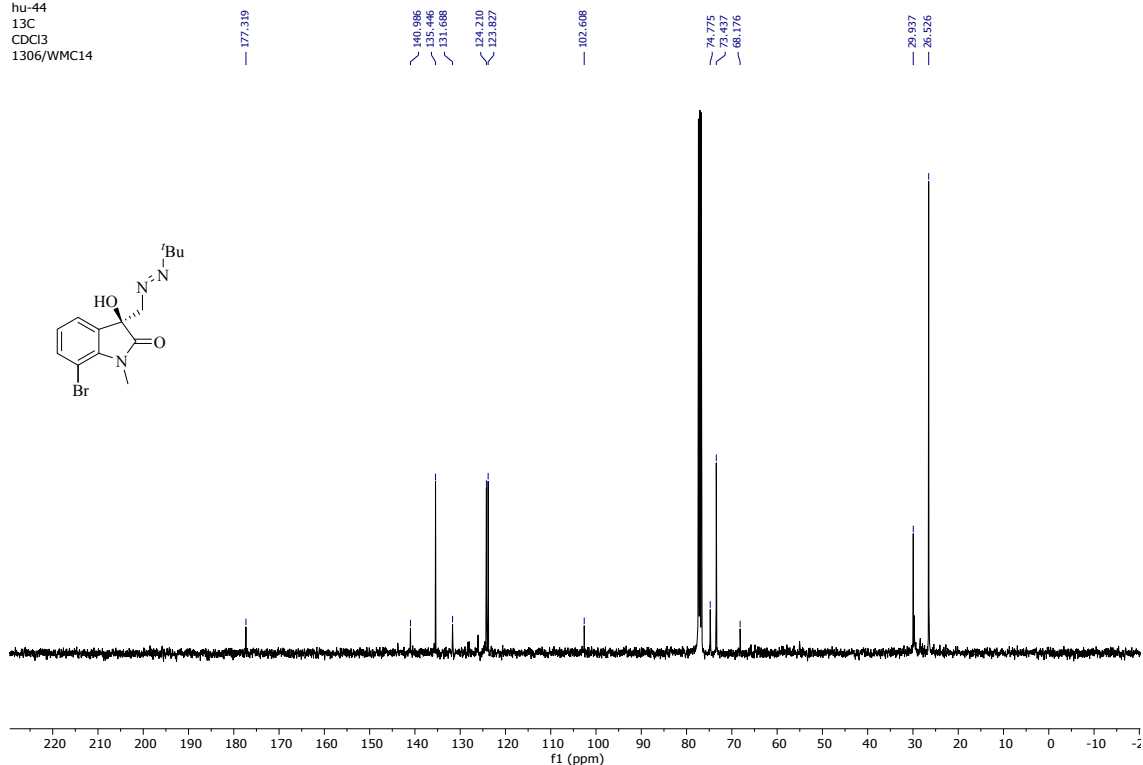

### <sup>1</sup>H NMR spectrum of **3a** (CDCl<sub>3</sub>, 400 MHz)

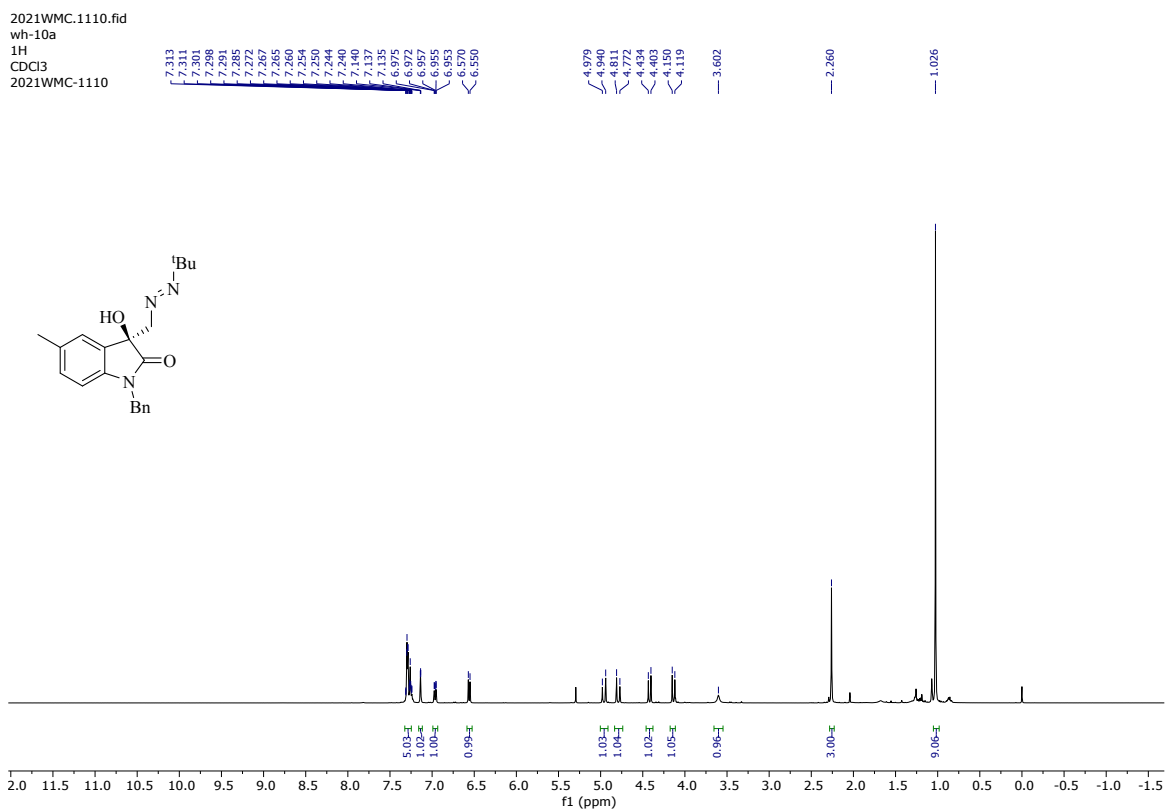

### <sup>13</sup>C NMR spectrum of **3a** (CDCl<sub>3</sub>, 100 MHz)

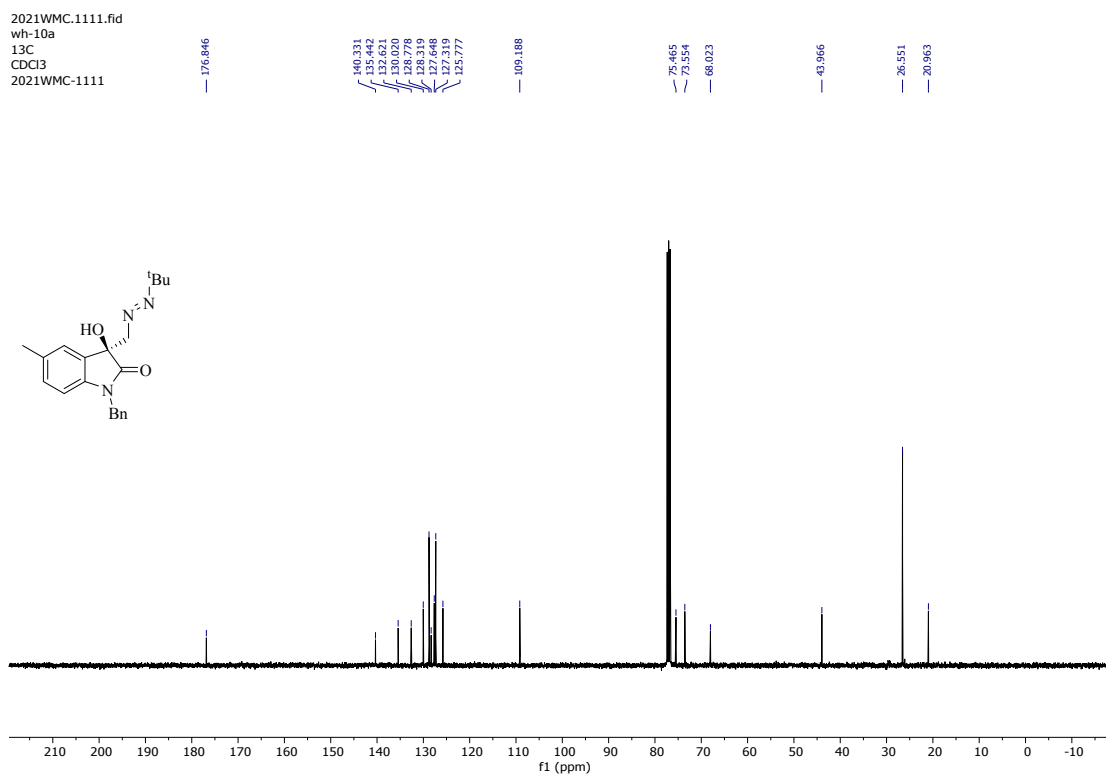

### <sup>1</sup>H NMR spectrum of **3ma** (CDCl<sub>3</sub>, 400 MHz)

WMC14-1289-1294.1293.fid  
hu-49  
1H  
CDCl<sub>3</sub>  
1293/WMC14

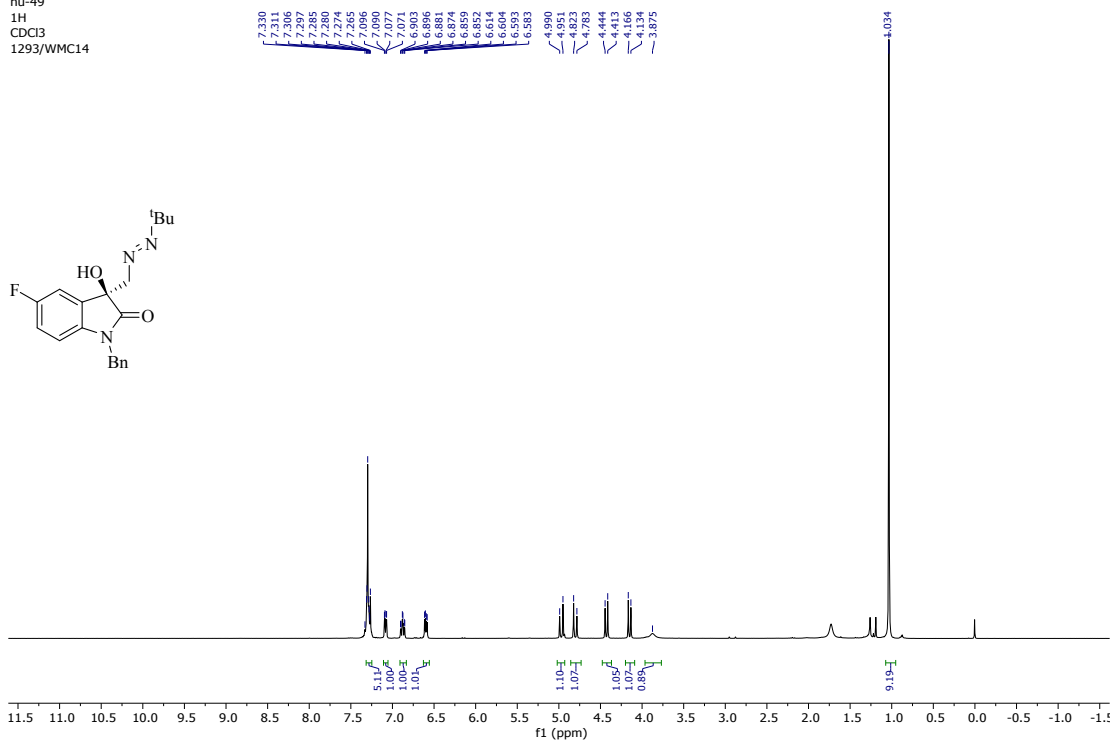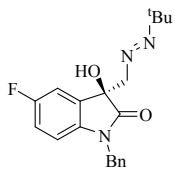

### <sup>13</sup>C NMR spectrum of **3ma** (CDCl<sub>3</sub>, 100 MHz)

WMC14-1289-1294.1294.fid  
hu-49  
13C  
CDCl<sub>3</sub>  
1294/WMC14

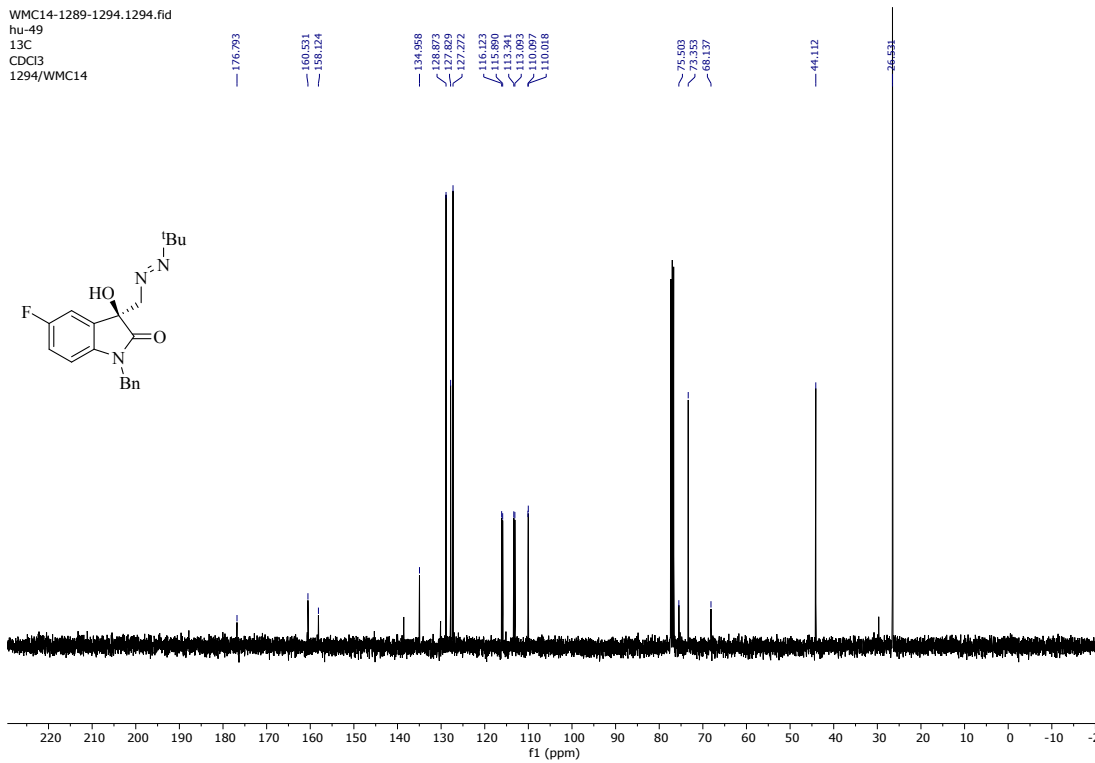

<sup>1</sup>H NMR spectrum of **4a** (CDCl<sub>3</sub>, 400 MHz)

WMC14-1216-1217.1216.fid  
hu-45  
1H  
CDCl3  
1216/WMC14

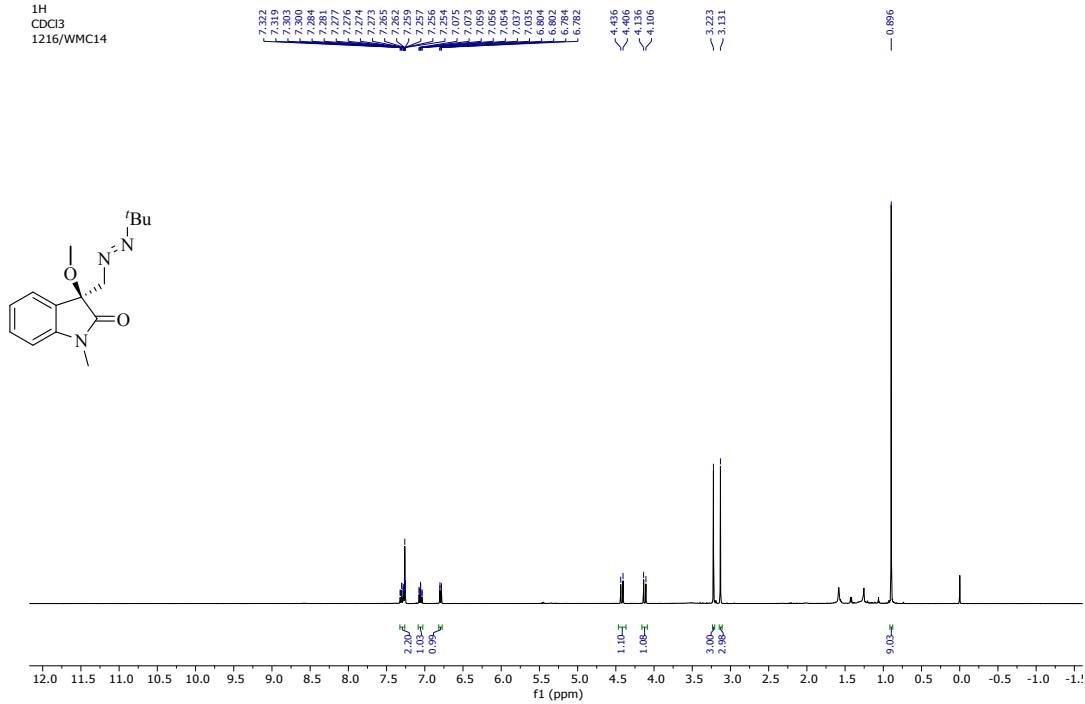

<sup>13</sup>C NMR spectrum of **4a** (CDCl<sub>3</sub>, 100 MHz)

WMC14-1216-1217.1217.fid  
hu-45  
13C  
CDCl3  
1217/WMC14

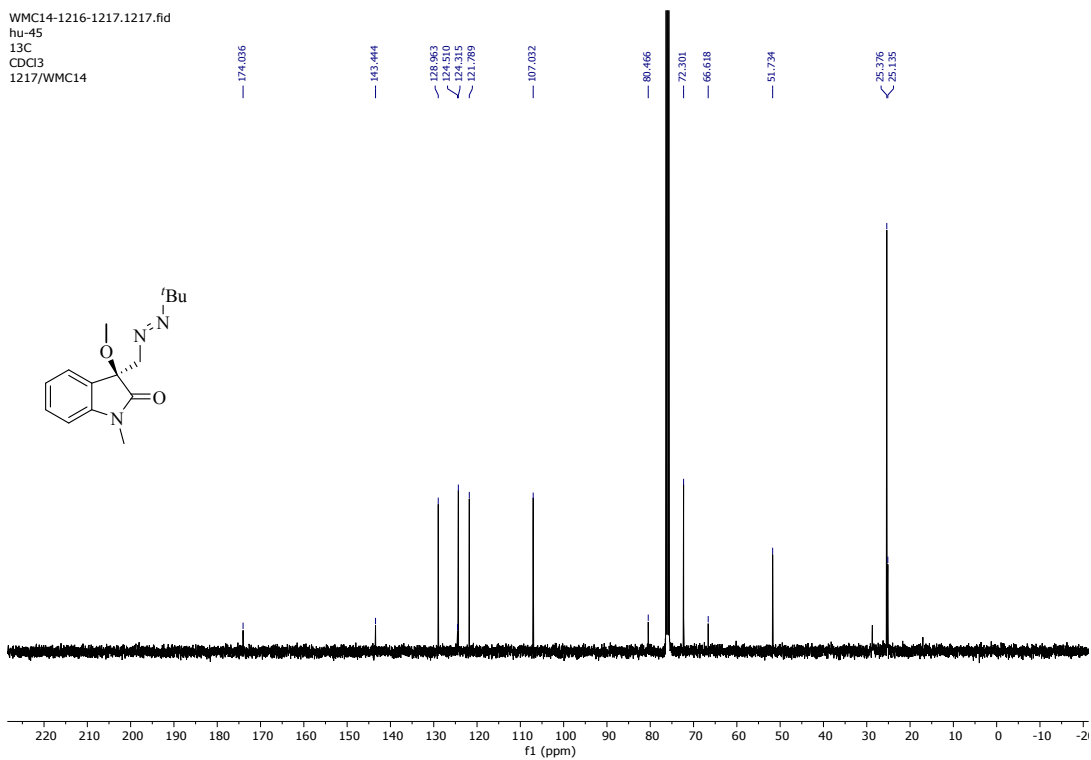

<sup>1</sup>H NMR spectrum of **4h** (CDCl<sub>3</sub>, 400 MHz)

WMC14-1325-1326.1325.fid  
hu-51  
1H  
CDCl3  
1325/WMC14

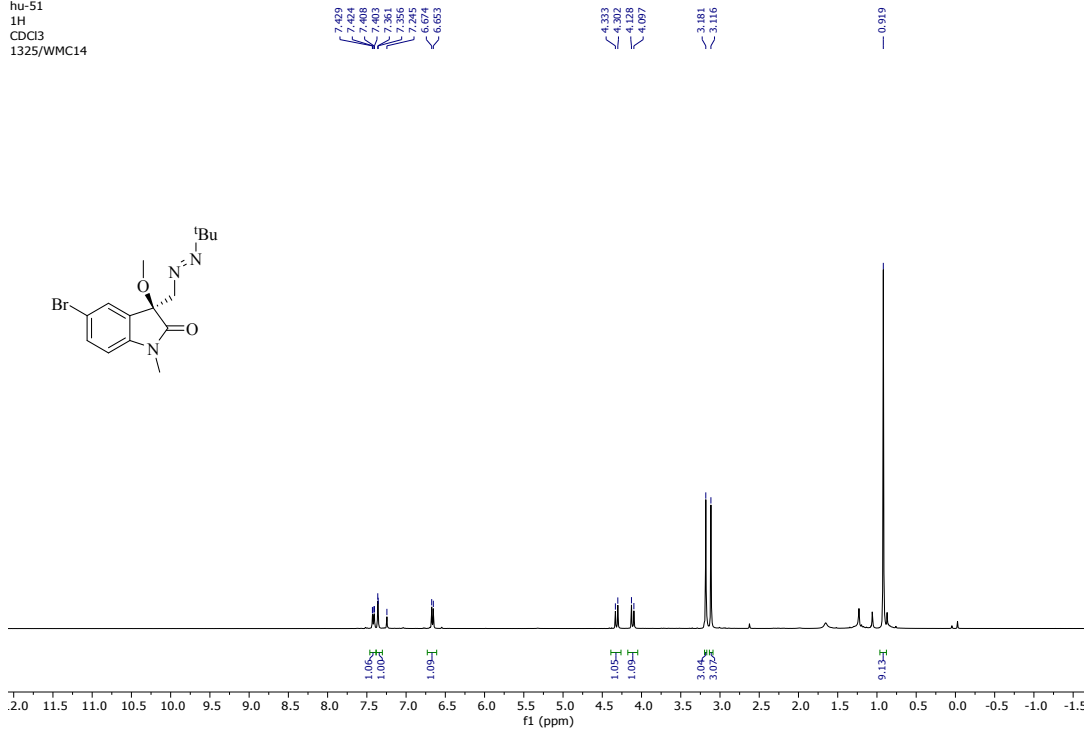

<sup>13</sup>C NMR spectrum of **4h** (CDCl<sub>3</sub>, 100 MHz)

WMC14-1325-1326.1326.fid  
hu-51  
13C  
CDCl3  
1326/WMC14

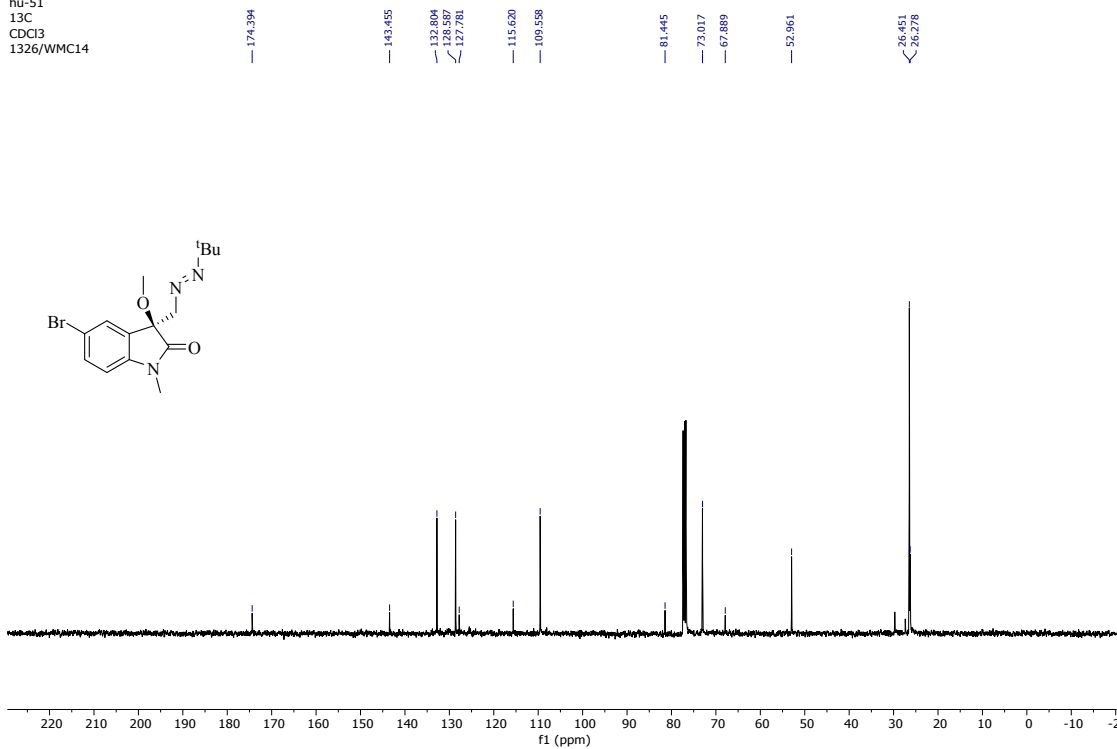



<sup>1</sup>H NMR spectrum of **3ab** (CDCl<sub>3</sub>, 400 MHz)

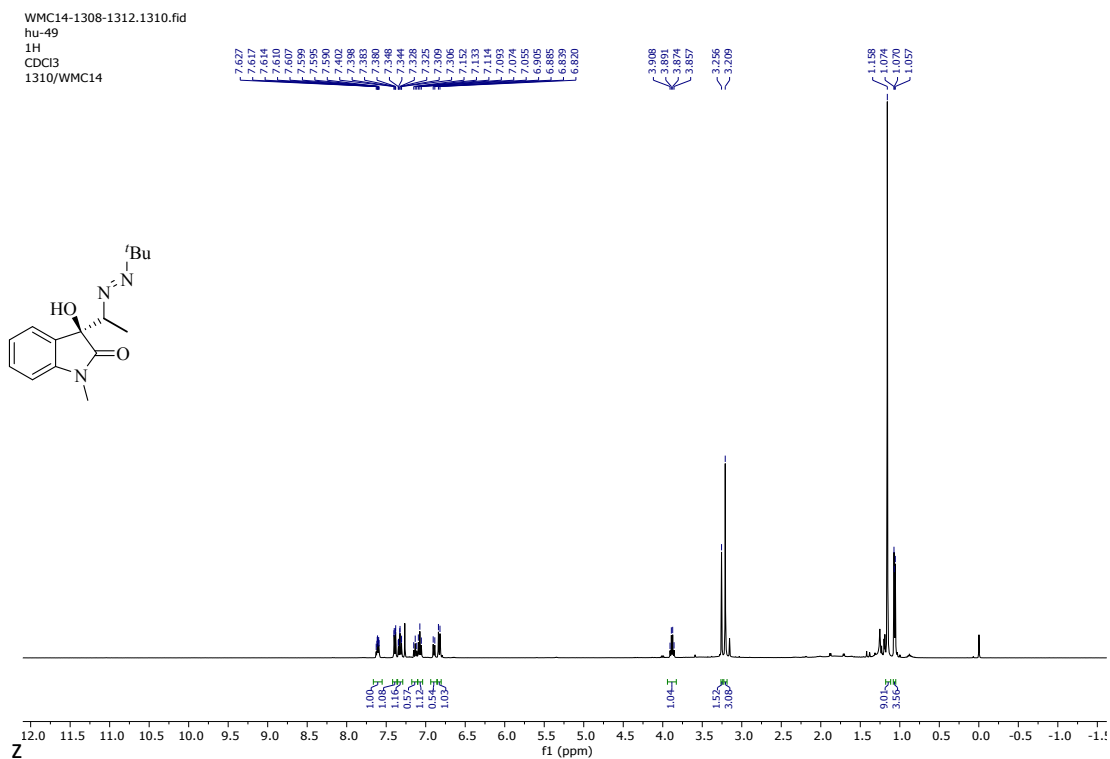

<sup>13</sup>C NMR spectrum of **3ab** (CDCl<sub>3</sub>, 100 MHz)

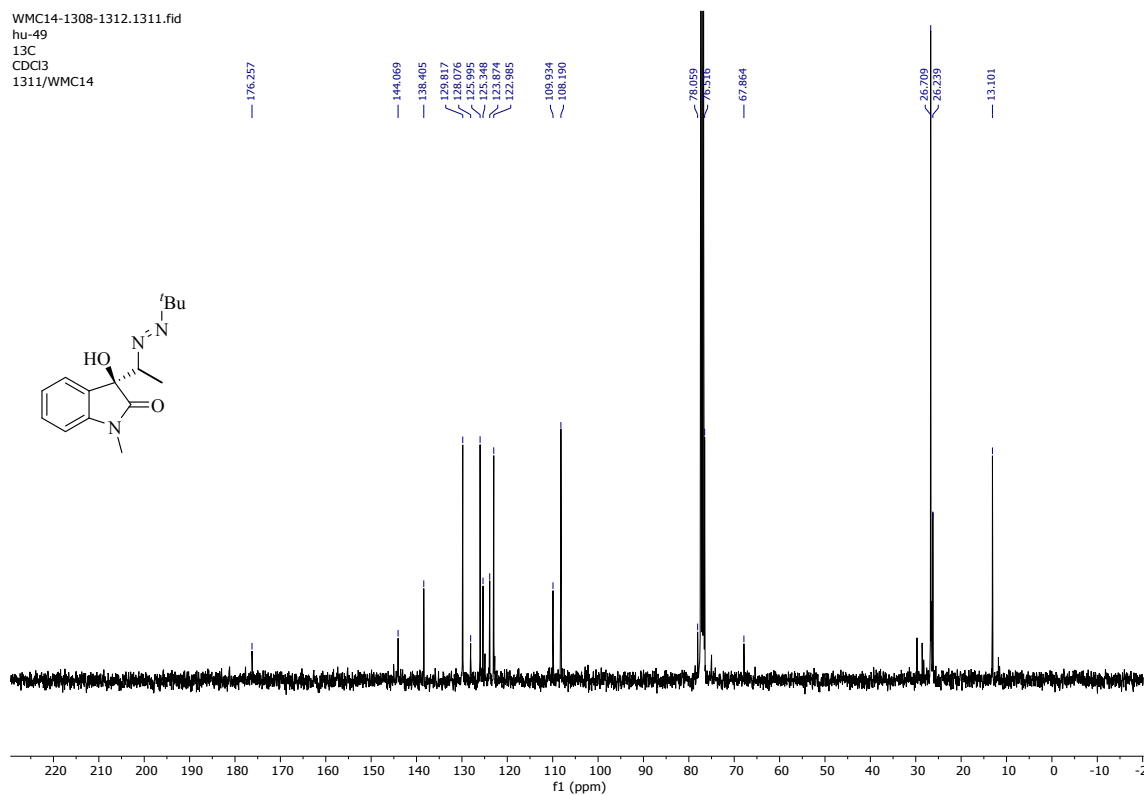

<sup>1</sup>H NMR spectrum of **L<sub>4</sub>** (CDCl<sub>3</sub>, 400 MHz)

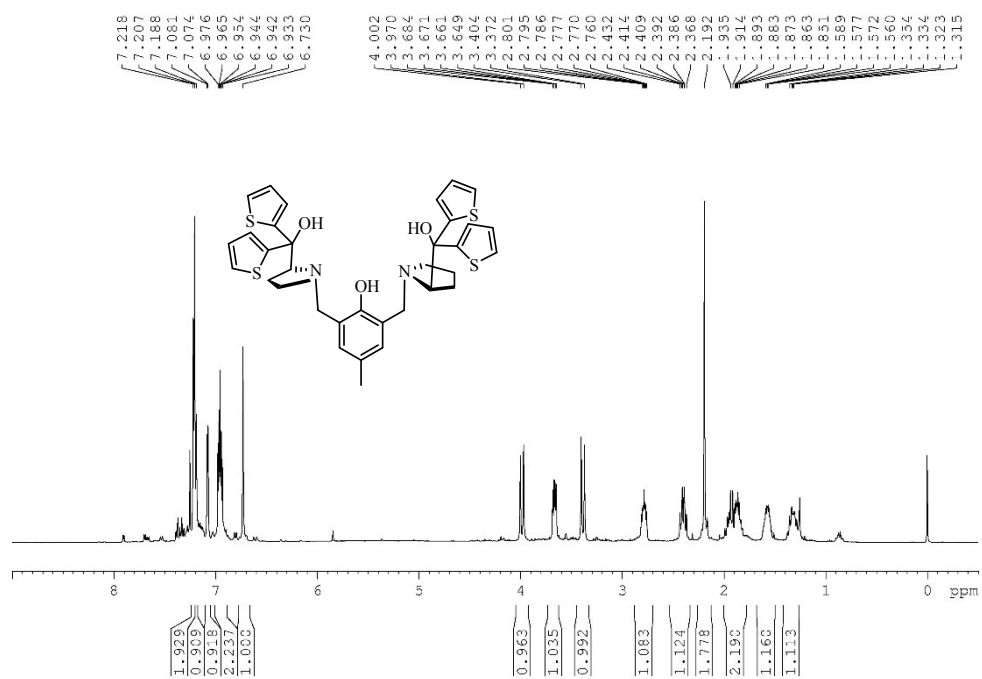

<sup>13</sup>C NMR spectrum of L<sub>4</sub> (CDCl<sub>3</sub>, 100 MHz)

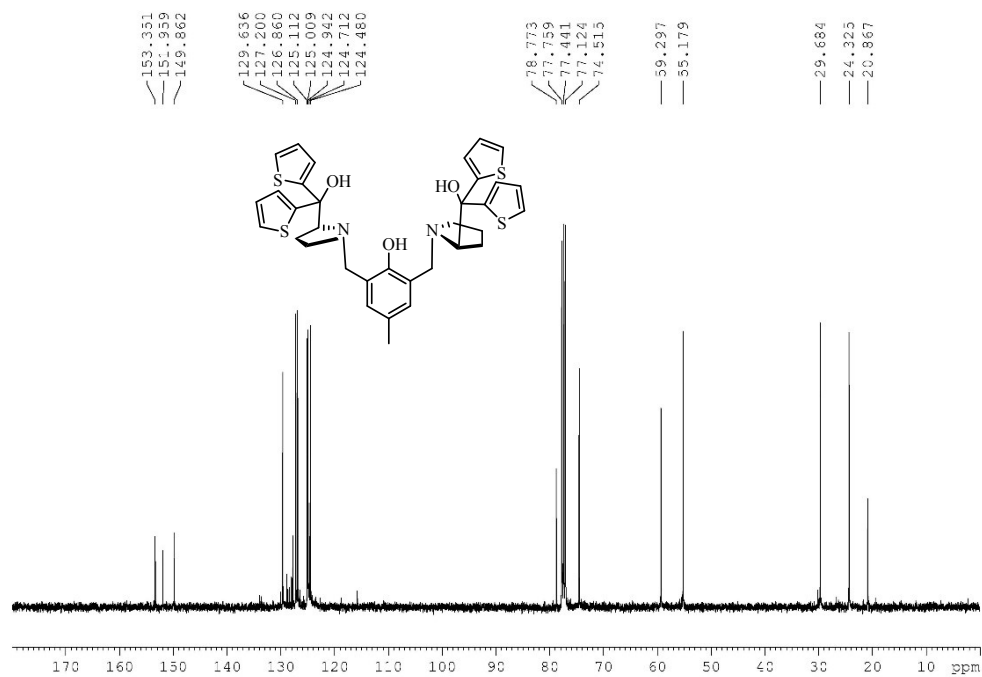

<sup>1</sup>H NMR spectrum of L<sub>2</sub> (CDCl<sub>3</sub>, 400 MHz)

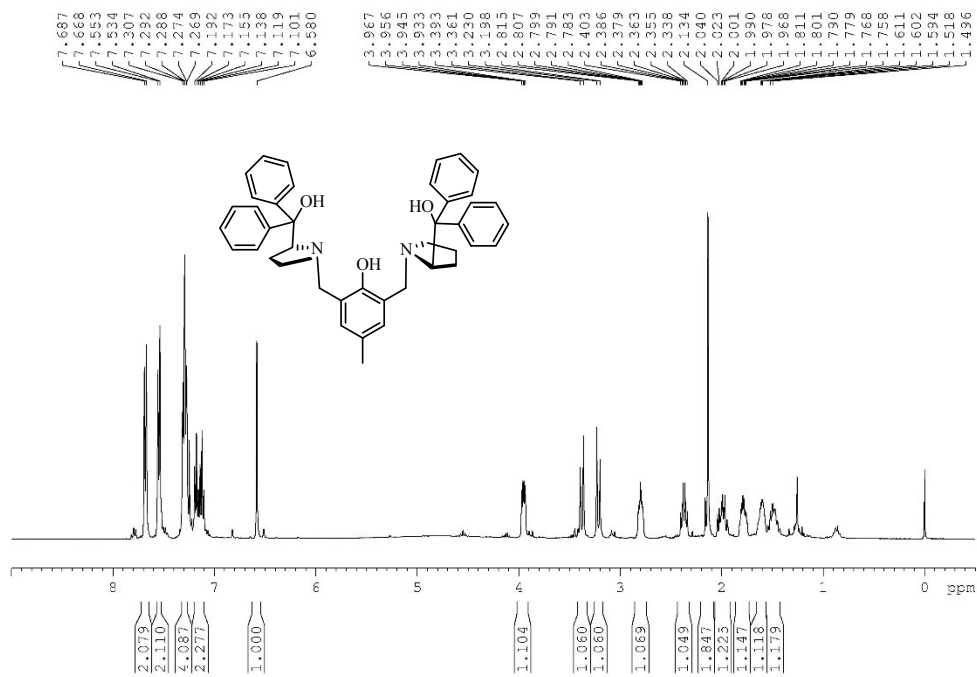

<sup>13</sup>C NMR spectrum of **L2** (CDCl<sub>3</sub>, 100 MHz)

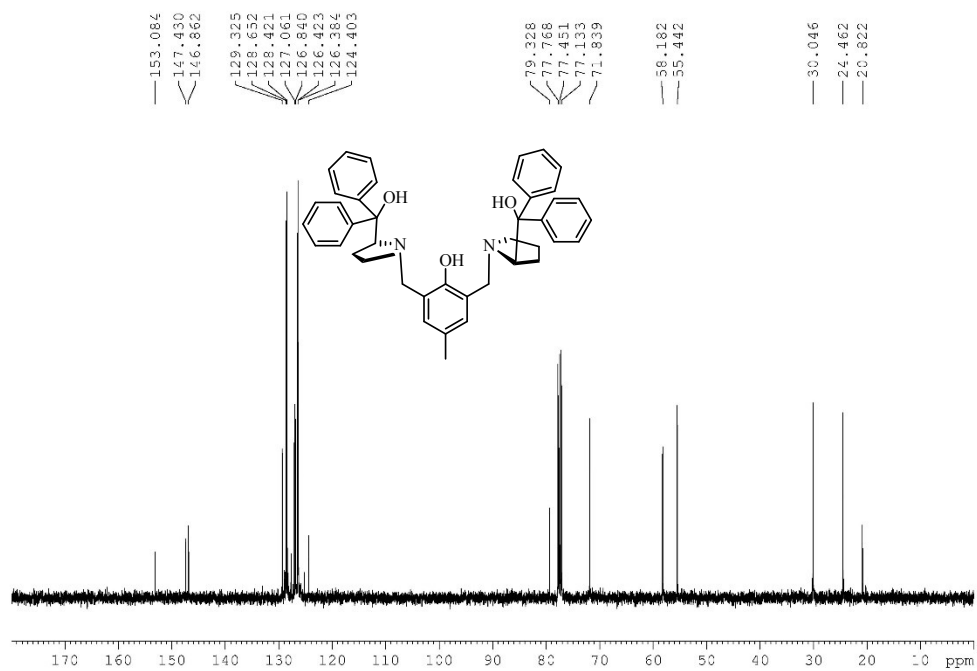

IR spectra:

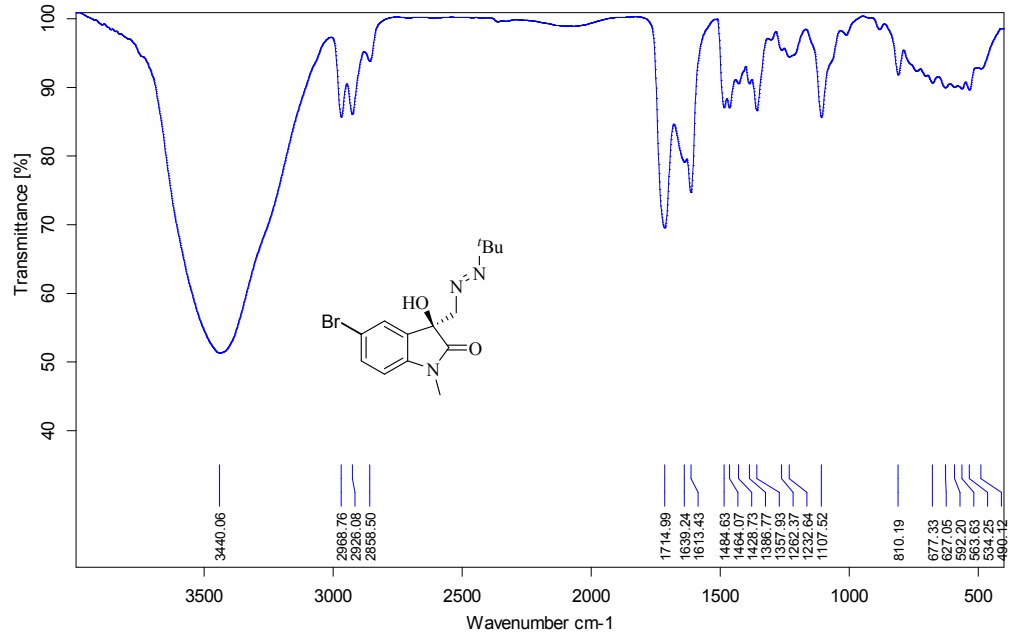

Page 1/1

HRMS spectra:

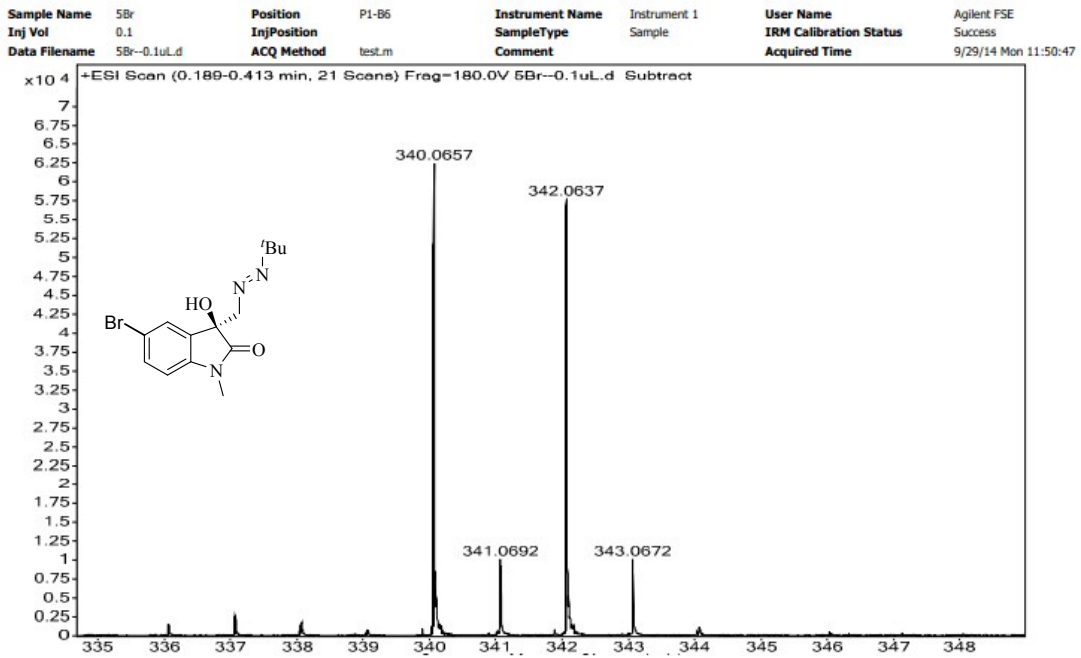

Supplement: d1ob00017a1.pdf [file d1ob00017a1.pdf]
